# Supplementary material for: Mixing at the extratropical tropopause as characterized bycollocated airborne H 2 O and O 3 lidar observations
Source: Copernicus journal article supplement (doi:10.5194/acp-2020-1085), 2020-10-26
Supplement: Supplementary file [file acp-2020-1085-AC2-supplement.pdf]

**ACP 2020-185: Mixing at the extratropical tropopause as characterized by collocated airborne H<sub>2</sub>O and O<sub>3</sub> lidar observation**

by Schäfler et al.

**Reply to review #2**

We thank the reviewer for the constructive comments and thorough review. We are glad that you considered our manuscript worthy for publication. We tried to better specify the scientific argument and the discussion of our results. Below you find detailed response (in blue font) to all your comments. At the end we added an updated version using track changes. Please note that all references to lines refer to this revised track change version.

This paper presents novel measurements of a 2-D cross-section of ozone and water vapour across a jet stream, identifying regions of mixed air using tracer-tracer distributions. There is considerable literature in this field drawn from in situ and satellite observations, and the methodology used in the paper follows previous work. The novelty therefore rests on the unique co-located lidar measurements that extend the previous studies into high-resolution 2-D curtains.

The study is certainly worthy of publication but I struggled with it in its present form. My main criticism is that the paper is much too long, with a wealth of detail presented at all turns that obscures the scientific argument. I sit necessary, for instance, to give a blow-by-blow description of each of the figures? Surely what is needed is to point out the features that feed into the scientific argument of the paper. As there is no conclusions section, the conclusions of the paper are included in the narrative, which means it is not clear what parts of the paper are necessary. It seems that the authors have applied all the analysis methods ever used in the past regardless of whether they bring new insight on the problem.

We changed the original version at several places to improve the readability and to follow your recommendations: This reduced the overall length by about 3 pages. In the introduction we added research questions to clarify the scientific focus of the study. Throughout the manuscript we removed conclusions from the narrative and we also removed two figures. As the other reviewer positively mentioned the clarity of the analysis, we kept the overall structure and tried to steer a middle course between keeping enough detail and shortening some descriptions. After a short summary, the discussion of the results evolves from the research question. Please see detailed comments below.

We agree that this study follows previous work and applies established methods to a novel set of lidar data, which is explicitly stated in the introduction and discussion. Although we do not propose new methods here, we think that the results are unique in the sense that they allow a verification and novel visualization of established concepts that are based on limited observation types and/or model simulations. We aimed at clarifying this.

The difficulties start with the Introduction, which provides a comprehensive summary of previous work but does not identify the scientific problem that needs addressing – instead we are told ‘For a more detailed characterization of the influence of the dynamics in individual synoptic situations on the distribution of trace gases in the ExTL, an observation capability for the instantaneous two-dimensional distribution of relevant trace gas along cross-sections through individual weather systems is required.’ Well yes, but why is a more detailed characterisation required? I’m not saying it isn’t, I’m saying that clearly identifying the problem that needs to be addressed will help focus the remainder of the paper and allow un-necessary detail to be removed.

We revised the introduction and included several research questions. We hope that it becomes clear how our case study wants to contribute to a more detailed characterization of the ExTL related to the dynamical situation, which was the aim of the WISE field experiment. The formulation “*For a...*” was removed.

Section 2.2 is one of the areas that would benefit from considerable reduction in length. It reads like a review article on tracer-tracer correlations. What is the information that is relevant to the analysis in this paper?

We followed the recommendation and revised Sect. 2.2 leading to a reduced length of 1.5 pages (instead of 2). We removed not relevant details on the ExTL statistical investigations and moved some content to Sect. 4. Some off-topic sentences were removed. However, we still consider the description of the basic methods, the appearance of mixing lines in T-T space, the applicability of O<sub>3</sub> and H<sub>2</sub>O and the selection methods of ExTL mixed air as relevant to understand our approach and the results.

What is the point of fig.4 and the accompanying text? Why not press straight on to the tracer-tracer correlations as these are the heart of the paper?

We removed Fig. 4 and the accompanying text.

Again, I could not understand the point of fig.6 and the accompanying discussion – whereas fig 7a is a real highlight, comprehensively demonstrating the power of the combined lidar observations.

We decided to keep Fig. 6 (now Fig. 5) as it gives context to the observations in T-T space that is considered to be important for the overall understanding of the observations in both depictions.

But 7b, the mixing factor analysis, doesn’t seem to me to be telling us anything new. That may be because of the confusing way the diagnostic is described – e.g l.414-420 seem to be trying to say something important but whatever it is makes no sense to me. The authors should either remove this analysis altogether, or rewrite it much more clearly and concisely so that it comes to a conclusion that advances the scientific argument in the paper.

We think that the mixing factor diagnostic gives valuable information about the composition of the ExTL through visualization of the transition therein. In combination with the T-T plot it informs about the strength and rapidity of the transition which is the motivation for the detailed analysis of data subsets in Fig. 9 (former Fig. 10, see also introduction to Sect. 3.5). We followed your recommendation and removed Fig. 8b (and related text in l. 414-420). We merged former Fig. 7b and 8a to a new Fig. 7 and tried to improve the related discussion.

I thought fig.9 worked well, and followed on nicely from 5c and 7a. Thanks!

What is the purpose of section 3.5, ‘Isentropic trace gas gradients’? Is it to calculate the dynamical tropopause? If so, the section heading would be better as ‘Comparison of the dynamical tropopause with isentropic trace gas gradients’. It seems that the key sentence in this section is that on l.511 ‘The PV-gradient tropopause follows the regions of highest isentropic trace gas gradients much better than the 2-PVU isoline, especially in case of the O<sub>3</sub> gradients, which confirms Kunz et al (2011b)’. However, I don’t agree with this sentence. First of all, the subjective ‘much better’ is not a scientific statement – by what criterion is it better, and how much better by this criterion? Secondly, the 2 PV contour in fig. 10f doesn’t do too badly at all below 340 K. I don’t think the tracer gradients support any particular definition of the dynamical tropopause, and challenge the authors to come up with a convincing diagnostic to show that they do.

As shown in earlier studies the interpretation of transport and mixing processes in the ExTL depend on the definition of the tropopause. Therefore, we investigate the relationship between chemical and

dynamical discontinuities which is not possible without curtain-like observations. We realized that this was not treated in the introduction which we improved by better motivating the topic. We follow the recommendation and changed the title of Sect 3.5 to *“Chemical and dynamical discontinuities at the tropopause”*.

*“much better”* was removed and we tried to better describe our interpretation of the relative location of trace gas and PV-gradient tropopause. We agree with your opinion about the situation below 340 K. However, above, the strongest gradients (especially of the stratospheric tracer  $O_3$ ) is shifted towards higher PV and is better represented by the PV-gradient tropopause. This reads now as (L566): *“The PV-gradient tropopause better represents the regions of highest isentropic trace gas gradients than the 2-PVU isoline, especially in case of the  $O_3$  gradients. It follows the center of maximum  $O_3$  gradients at the level of highest wind speeds and above. Maximum  $H_2O$  gradients are located north of the PV-gradient tropopause at even higher PV values at the jet stream level where pronounced gradients are visible.”*

This is the first observational evidence of this relationship at the extratropical tropopause. We added some details to the summary and discussions.

The summary needs to set out more clearly what the conclusions of this work are, and how they advance our understanding of the tropopause region. There is a very good paper in here but the authors need to sharpen their arguments and dispense with superfluous detail in order to let it blossom.

We agree to your comment that the conclusion wasn't clear enough, which was partly connected to missing clarity regarding the scientific questions that we added now. This is also in line with reviewer #1 and therefore we completely revised Sect. 4. The restructured paragraphs now follow the questions that were posed in the introduction. As stated above we moved some conclusion from the main text to the end and tried to make clear how our analysis confirmed earlier concepts and how we contribute to a better understanding of the tropopause region. Please re-read the revised version of Sect. 4

Minor comments

I.16 ‘allows to identify’ -> identifies (you can't use the construction ‘subject allows to verb’ in English, it needs to be ‘subject allows object to verb’.) On line 150 I have suggested the latter construction; here and on l. 538 the ‘allows to’ is superfluous. [Done](#).

I.18 ‘surroundings’ [Done](#).

I 18, 218 and 268 ‘indicative of’ [Done](#)

I.20 ‘confirm that the mixing is strongest’ [Done](#)

I.21 ‘the strongest’ [Done](#)

I.23 ‘Although the methods do not allow conclusions to be drawn either on the individual mixing process or on the location and time of the event’ [The sentence was changed accordingly.](#)

I.24 ‘allows the formation ... T-T space to be discussed and hypotheses to be developed about mixing on ..’ [Done](#)

I.25 ‘The 2-D lidar data presented’ [Done](#)

I.49 ‘However, the DIAL they used was not capable of accurately measuring’ [Done](#)

I.95 ‘..EXTL in the context of the’ [This sentence was removed.](#)

I.125 'ratio of both signals as a function of the time taken to pass through the atmosphere, and knowledge about the exact absorption characteristics' [Done](#)

I.150 'allowed the mixing layer to be delineated' [Done](#)

I.200 what do you use as a definition of the dynamical tropopause? (I know you answer this question later but it helps the reader to know your definition at this point)

*We changed the sentence to (L246): "The main parameters of interest are wind speed to identify the jet stream, pressure and potential temperature for the vertical context as well as potential vorticity (PV). Please note that 2 PVU are used for locating the dynamical tropopause."*

I.223 'tropospheric air' [Done](#)

I.229 'both in situ' (no comma) [Done](#)

I.234 'meridional' (not zonal) [Done](#)

I.338 'high potential temperatures that increase towards lower ozone, which corresponds to vertically decreasing ozone values' Fig. 3b shows a range of ozone values between 100 and 500 ppb for  $\theta > 360$  K, which is not consistent with this sentence

*Maybe this is a misunderstanding. The sentence refers to air mass STRA only which shows decreased Theta at the lower boundary (~300 ppb). An explanation is given in the subsequently following sentence.*

I.386 This paragraph makes specific reference to the dynamical tropopause. How does this differ from the thermal tropopause well to the north of the jet?

*We added the thermal tropopause to Fig. 6 and Fig. 7 and added: "In the northern part of the flight section, the bottom of the ExTL (MIX-2) agrees with the dynamical tropopause while the thermal tropopause lies within the ExTL and approximately follows the 3.5 PVU contour. Please note that the thermal tropopause provides a typical split structure near the jet stream while the dynamical tropopause proceeds vertically (e.g. Randel et al., 2007)."*

I.406 'Please note.....' This sentence does not make sense –please rewrite

*Changed to: "Please note that the selected ExTL air masses slightly differ from Fig. 4 due to the application of constant minimum thresholds."*

I.41 surroundings [Done](#)

I.429 the callout '(fig 9b)' is in the wrong place [Corrected](#)

I.430 missing figure callout '()' [Removed](#)

I.463 the sentence 'In dynamic...' has no verb in the second clause and does not make sense. [This section was revised and the sentence was deleted.](#)

I.486 what does 'angular' mean? [Changed to \(L541\): "meridian resulted in edged PV distributions on isentropes"](#)

I.492 Below the jet maximum your PV tropopause is displaced towards lower, not higher PV. [We removed this sentence](#)

I.538 'allowed to identify' -> identified [Done](#)

I.539 'losing' [Done](#)

# Mixing at the extratropical tropopause as characterized by collocated airborne H<sub>2</sub>O and O<sub>3</sub> lidar observations

Andreas Schäfler<sup>1</sup>, Andreas Fix<sup>1</sup>, Martin Wirth<sup>1</sup>

<sup>1</sup>Deutsches Zentrum für Luft- und Raumfahrt, Institut für Physik der Atmosphäre, Oberpfaffenhofen, Germany

5 *Correspondence to:* Andreas Schäfler (Andreas.Schaefer@dlr.de)

## Abstract

The composition of the extratropical transition layer (ExTL), which is the transition zone between the stratosphere and the troposphere in the mid-latitudes, largely depends on dynamical processes fostering the exchange of air masses. The Wave-driven Isentropic Exchange (WISE) field campaign in 2017 ~~Here we follow the need to better~~ aimed for a better characterization of the ExTL in relation to the dynamic situation. This study investigates the potential of ~~using~~ the first-ever collocated airborne lidar observations of ozone (O<sub>3</sub>) and water vapour (H<sub>2</sub>O) across the tropopause to depict the complex trace gas distributions and mixing in the ExTL. A case study of a perpendicular jet stream crossing with a coinciding strongly sloping tropopause is presented ~~The potential of such lidar profile data, required for a novel, two-dimensional depiction of the complex trace gas distributions and mixing along cross sections, is illustrated for a perpendicular jet stream crossing during that was observed during~~ a research flight over the North Atlantic ~~conducted on 1 October 2017 in the framework of the Wave-driven Isentropic Exchange (WISE) field campaign.~~ The collocated and range-resolved lidar data is applied to established tracer-tracer (T-T) space diagnostics and proves to be suitable to identify the ExTL and to reveal distinct mixing regimes that enabled a subdivision of mixed and tropospheric air. A back projection of this information to geometrical space shows remarkably coherent structures of these air mass classes along the cross-section. This represents the first almost complete observation-based two-dimensional (2D) illustration of the shape and composition of the ExTL and a confirmation of established conceptual models. The trace gas distributions, that represent typical H<sub>2</sub>O and O<sub>3</sub> values for the season, reveal tropospheric transport pathways from tropics and extratropics that have influenced the ExTL. Although the combined view of T-T and geometrical space does not inform about the process, location and time of the mixing event it gives insight into the formation and interpretation of mixing lines. A mixing factor diagnostic and a consideration of data subsets show that recent quasi-instantaneous isentropic mixing processes impacted the ExTL above and below the jet stream which is a confirmation of the well-established concept of turbulence-induced mixing in strong wind shear regions. At the level of maximum winds reduced mixing is reflected in jumps in T-T space that occurred over small horizontal distances along the cross section. For

a better understanding of the dynamical and chemical discontinuities at the tropopause the lidar data is illustrated in isentropic coordinates. The strongest gradients of  $\text{H}_2\text{O}$  and  $\text{O}_3$  are found to be better represented by a PV-gradient-based tropopause compared to traditional definitions dynamical tropopause using constant PV values. The presented 2D lidar data is considered to be of relevance for the investigation of further meteorological situations leading to mixing across the tropopause and for future validation of chemistry and numerical weather prediction models.

The analysis of the ExTL shape and composition uses a combined view of the lidar data in geometrical and tracer-tracer ( $T-T$ ) space, which was so far not possible from existing observations. For this particular case study, which is considered to be representative for the climatological distribution, the  $T-T$  depiction allows to identify distinct mixing regimes that suggest mixing of air masses with differing origin: we find clearly separated mixing of stratospheric air with moist extratropical air as well as with dry tropical air in the surrounding of the extratropical jet stream. This separation is indicative for differing transport pathways in the troposphere which need to be further elaborated using Lagrangian diagnostics. The  $\text{O}_3$  and  $\text{H}_2\text{O}$  distributions confirm strongest mixing above and below the maximum jet stream winds, while it is suppressed in between. The interrelation of chemical and dynamical discontinuities is investigated and strongest isentropic trace gas gradients are found to be better correlated with maximum isentropic PV gradients than with classical dynamical tropopause definitions. Although the methods neither allow conclusions on the individual mixing process nor on the location and time of the event, the consideration of data subsets allows discussing the formation and interpretation of isentropic and vertical mixing lines in  $T-T$  space and to develop hypotheses on mixing at different time scales. The presented two-dimensional lidar data is considered to be of relevance for the investigation of further synoptic situations leading to mixing across the tropopause and for future validation of chemistry and numerical weather prediction models.

## 1 Introduction

The extratropical transition layer (ExTL) is a subregion of the extratropical upper troposphere and lower stratosphere (ExUTLS) which is relevant both for climate (Riese et al. 2012) and weather (Gray et al., 2014). Radiatively active trace gases, like ozone ( $O_3$ ) and water vapour ( $H_2O$ ) provide significant vertical gradients across the ExTL, and the tropopause therein, that impact the Earth's radiation budget. The transition from the troposphere to the stratosphere can be abrupt or more uniform in cases where the ExTL is strongly impacted by two-way stratosphere-troposphere exchange (STE) processes. Depending on their life time, ~~observed~~ trace gases reveal a footprint of the mixing processes in their Lagrangian history, typically as an intermediate chemical characteristic with both tropospheric and stratospheric influence, highlighting irreversible and bidirectional transport between the spheres (Gettelman et al. 2011). These mixing processes strongly depend on the dynamical situation. For a better understanding of the role of multi-scale dynamical processes on the composition of the ExTL in the mid-latitudes the Wave-driven Isentropic Exchange (WISE) field campaign (Kunkel et al., 2019) was conducted over the North Atlantic Ocean in autumn 2017. The HALO (High Altitude Long range) research aircraft performed in situ and remote sensing measurements of various trace gases in the ExTL from turbulence to synoptic scale in a variety of ~~synoptic-meteorological~~ situations.

Mixing in the extratropics is often related to upper-level frontal zone–jet stream systems (Keyser and Shapiro, 1986; Lang and Martin, 2012) that are characterized by isentropic surfaces that cross the sloped tropopause (Holton et al., 1995; Stohl et al., 2003). The highly variable mid-latitude flow is largely affected by baroclinic cyclones that develop from disturbances in the jet stream and cause a strong distortion of the tropopause through redistribution of tropospheric and stratospheric air masses. Intrusions of stratospheric air into the troposphere are connected to jet streams and cyclones and represent areas of irreversible mixing of tropospheric and stratospheric air due to filamentation (Danielsen, 1968; Danielsen et al., 1987) and roll-up up of intrusions (Appenzeller et al., 1996). Strong wind shear above and below the jet stream maximum results in clear air turbulence fostering the exchange between stratosphere and troposphere (Shapiro, 1976; Shapiro, 1980). Recently, Spreitzer et al. (2019) have shown the importance of turbulence in upper-level frontal zone–jet stream systems and tropopause folds for mid-latitude dynamics. Beside turbulence, a variety of other non-conservative diabatic processes occur near jet streams and cyclones that foster cross-isentropic mixing, e.g., cloud diabatic processes in convective or large-scale clouds (Gray et al., 2003; Wernli and Bourqui, 2000) or radiative processes related to vertical  $H_2O$  gradients or clouds (Zierl and Wirth, 1997). Additionally, thunderstorms were shown to impact the ExTL composition (e.g., Huntrieser et al., 2016; Pan et al., 2014a) often being triggered by large-scale weather systems. The spatiotemporal diversity of the flow and the complex life of cyclones results in a large variety of mixing and exchange processes

that were found from case studies and climatologies (Sprenger et al., 2003; Škerlak et al., 2014; Reutter et al., 2015; Boothe et al., 2017) and explains the complexity that ExTL observations have shown in terms of their chemical characteristics.

75 Mixed air masses can be identified by relationships between long-lived chemical trace gases (Hintsa et al., 1998, Fischer et al., 2000; Hoor et al., 2002; Zahn and Brenninkmeijer, 2003; Pan et al., 2004). This correlation of tropospheric and stratospheric tracers with opposing behaviour (tracer-tracer or T-T correlation, explained in more detail in Sect. 2.2), e.g., of O<sub>3</sub> and H<sub>2</sub>O, was used to separate mixed air masses of intermediate chemical characteristics from the undisturbed background to explore the average composition and extent of the ExTL (see summary in Gettelman et al., 2011). Many of these climatological studies made use of data  
80 from multiple research flights, multiple campaigns or used satellite data. In situ observations of chemical species on board commercial aircraft (e.g., Brenninkmeijer et al., 2007) are restricted to the flight routes and the altitude range of the aircraft and provide only a limited number of vertical profiles during start and landing (Zahn et al., 2014). The use of satellite observations guarantees a high temporal resolution and global coverage, however, is limited in vertical resolution (about 1–3 km in the UTLS) and rather high measurement uncertainty in the tropopause region (Hegglin et al., 2008; Hegglin et al., 2009). Aircraft in situ data  
85 obtained during research campaigns are highly accurate and temporally resolved, however, with limited spatial and temporal coverage.

Several case studies, typically using repeated in situ flight legs at different altitudes to provide a certain altitude resolution showed a strong influence of the synoptic situation on the interplay of dynamics and chemistry (e.g., Pan et al., 2007; Vogel et al., 2011; Konopka and Pan, 2012). Pan et al. (2007) contrast two different dynamical conditions, a strong jet stream with a complex  
90 tropopause fold structure and a flat tropopause situation, and found a correlation between the sharpness of the chemical and thermal transitions with minimal mixing in the flat tropopause situation. Mixed air masses dominated on the cyclonic jet stream side in an area where the dynamical and thermal tropopause were separated. Konopka and Pan (2012) used in situ observations in combination with a trajectory model to demonstrate that large parts of the ExTL near a jet stream are formed on time scales of a few days, especially in the lower part of the jet stream. A combined approach of in-situ data in geometrical and T-T space was used to locate  
95 mixed, stratospheric and tropospheric air masses along selected flight legs crossing the ExTL horizontally and vertically (Pan et al. 2006; Pan et al., 2007; Vogel et al., 2011; Konopka and Pan, 2012). However, a detailed attribution of mixing lines to locations in geometrical space and an isentropic investigation was so far limited by the reduced information content of staggered in situ legs.



100 ~~For a more detailed characterization of the influence of the dynamics in individual synoptic situations on the distribution of trace gases in the ExTL, an observation capability for the instantaneous two-dimensional distribution of relevant trace gas along cross-sections through individual weather systems is required.~~

The interrelation of chemical and dynamical discontinuities at the tropopause is of central interest to understand trace gas distributions and their relation to transport and mixing processes. However, the analysis of the structure and location of the ExTL depends on the definition of the tropopause (e.g. Pan et al. 2004). In the vertical the ExTL is centered on the thermal tropopause while the dynamical tropopause (using a 2 Potential Vorticity Units ( $PVU = 10^{-6} \text{ K m}^2 \text{ kg}^{-1} \text{ s}^{-1}$ )) definition) marks the bottom of the ExTL. Near the extratropical jet stream where the thermal tropopause typically features a large break in altitude, the dynamical tropopause runs almost vertical across isentropes. Kunz et al. (2011b) found better consistency of isentropic trace gas gradients with a PV-gradient-tropopause (Kunz et al., 2011a) compared to fixed PV thresholds defining the dynamical tropopause. However, for

105 an instantaneous latitudinal cross-section, they could only show that this holds for simulated trace gas data.

Two-dimensional (2D) profiles from active and passive remote sensing instruments on board research aircraft can fill ~~the~~<sup>is</sup> observational gap between airborne in situ and satellite measurements. Passive airborne limb sounders ~~allowed enable for~~ retrieving vertical profiles of a multitude of trace gas species ~~near the subtropical jet stream~~ (Unger mann et al., 2013). Limb sounders ~~instruments~~ provide a good along track ( $\sim 3 \text{ km}$ ) and vertical resolution (200 to 300 m depending on the observed altitude) to resolve

115 tropopause-based gradients. However, the low ~~line-of-sight~~ resolution along their line-of-sight requires homogeneity in viewing direction as gradients can cause artefacts in the trace gas profiles. Woiwode et al. (2019) ~~investigated-illustrate~~ the applicability of the linear limb-imaging GLORIA (Gimballed Limb Observer for Radiance Imaging of the Atmosphere) to observe the fine structure of a tropopause fold. In contrast, Aactive remote sensing with airborne Differential Absorption Lidar (DIAL) offers both, a high horizontal and vertical resolution directly beneath the aircraft. Early pioneering studies demonstrated the significance of range-

120 resolved profiles of  $\text{O}_3$  (Browell et al., 1987) and of  $\text{H}_2\text{O}$  (Ehret et al., 1999) to characterize mesoscale tropopause folds. The benefit of using simultaneous lidar measurements of  $\text{H}_2\text{O}$  and  $\text{O}_3$  was emphasized by Kooi et al. (2008) showing observations in the tropical troposphere. However, ~~their used~~ DIAL they used ~~it was~~ not capable to accurately measure the low  $\text{H}_2\text{O}$  mixing ratios occurring in the stratosphere (Browell et al., 1998). Pan et al. (2006) combined lidar  $\text{O}_3$  cross sections with in situ data to investigate mixing in the ExTL. During WISE, the first ever collocated DIAL nadir profile observations of  $\text{H}_2\text{O}$  and  $\text{O}_3$  (Fix et al., 2019) were made in

125 ~~the ExTL across the tropopause, which offers instantaneous information on the structure of the ExTL in dependence of the underlying dynamical situation.~~

Recently, collocated profile observations of  $\text{H}_2\text{O}$  and  $\text{O}_3$  across the extratropical tropopause from a single aircraft to investigate the structure of the ExTL became possible (Fix et al., 2019). This methodology thus provides new insights into the 2D structure of the

ExTL and the chemical and dynamical discontinuity therein in order to verify past concepts and add new details to our current knowledge (see review article by Gettelman et al., 2011). This study therefore makes use of these unique observations to address the following questions:

- Is the precision of O<sub>3</sub> and H<sub>2</sub>O lidar observations sufficient to determine the ExTL using established T-T diagnostics? Can the 2D structure of the ExTL along an extratropical jet stream crossing be depicted by a back projection of diagnostics from T-T space to geometrical space?
- Does this combined view reveal distinct mixing regimes along the cross section that provide information on the complex chemical structure and mixing state of the ExTL? How do they relate to the dynamical situation and what do they tell about the preceding transport of the observed air masses? How representative is the presented case study?
- Can the O<sub>3</sub> and H<sub>2</sub>O observations for a range of isentropic levels at the mid-latitude tropopause be used for an improved localization of the chemical and dynamical discontinuity between stratosphere and troposphere?
- How can the mixing lines be interpreted correctly? What can we learn on the formation of mixing-lines for different data subsets along the cross-section?

This paper will describe the DIAL O<sub>3</sub> and H<sub>2</sub>O lidar observations in (Sect. 2.1) and their combined application to established T-T diagnostics in (Sect. 2.2). This provides a novel way to gain information about the ExTL mixing state along a cross section using a back projection of information from T-T space to geometrical space, which was so far not possible from existing observational capabilities. The aim is to test whether the curtain-like observations of O<sub>3</sub> and H<sub>2</sub>O across the tropopause are sufficient to characterize the complex chemical structure in the ExTL for a text-book-like situation with a transect of a zonal extratropical jet stream observed over the North Atlantic Ocean during WISE on 1 October 2017 (is explained in Sect. 3.1). In Sect. 3.2 to 3.4 the lidar data is presented along cross-sections, in T-T space and in combined view, respectively. The interrelation of chemical and dynamical discontinuities at the midlatitude tropopause is described in Sect. 3.5. A discussion of the results and conclusion is given in Sect. 4.

For the first time, distinct mixing regimes for a range of isentropic levels across the tropopause allow a detailed depiction and description of the transition from stratosphere to troposphere (Sect. 3.2–3.4). Additionally, isentropic O<sub>3</sub> and H<sub>2</sub>O gradients are determined to investigate the interrelation of chemical and dynamical discontinuities at the mid-latitude tropopause (Sect. 3.5). Section 4 gives a summary of the results. In a follow-up paper we aim to apply Lagrangian diagnostics to investigate the role of differing transport pathways and the timescales that were relevant for the complex distribution of O<sub>3</sub> and H<sub>2</sub>O in this case.

## 2 Data and methods

### 2.1 Lidar observations onboard HALO

During the WISE campaign, the German research aircraft HALO (Krautstrunk and Giez, 2012) was equipped with the Water Vapour Differential Absorption Lidar in Space (WALES), which was originally designed as a four-wavelength H<sub>2</sub>O DIAL operating at 935 nm (Wirth et al., 2009). In the past, WALES was characterized and applied in multiple campaigns focussing on various topics ranging from atmospheric dynamics (e.g. Schäfler et al., 2015; Schäfler et al., 2018), moisture transport (e.g., Schäfler et al., 2010; Kiemle et al., 2011), cloud-microphysics (Urbanek et al., 2017) to UTLS investigations (Trickl et al., 2016). In 2012, the system was extended by an optional O<sub>3</sub>-DIAL capability (Fix et al., 2019) to be able to measure collocated profiles of O<sub>3</sub> and H<sub>2</sub>O. During the “Polar Stratosphere in a Changing Climate” (POLSTRACC; Oelhaf et al., 2019) campaign in 2016, this capability was used for the first time, ~~however but~~, in a zenith pointing mode for stratospheric observations. However, during WISE the lidar was exclusively measuring nadir.

The measurement principle of the DIAL is based on the differential absorption of laser pulses at two or more wavelengths. The spectrally close wavelengths are selected such that absorption and scattering properties on their way through the atmosphere only differ with respect to absorption by the trace gas of interest, i.e. O<sub>3</sub> and H<sub>2</sub>O. Accordingly, the system creates two wavelengths for H<sub>2</sub>O DIAL in the absorption band at 935 nm and two wavelengths for O<sub>3</sub> DIAL at 305 and 315 nm. For both pairs of wavelengths, one wavelength provides a strong absorption depending on the trace gas concentration, while the other is absorbed only weakly resulting in a stronger backscatter signal. From the ratio of both signals ~~as a function in dependence~~ of the time ~~needed taken for to passing through~~ the atmosphere, and the knowledge about the exact absorption characteristics, a range-dependent determination of O<sub>3</sub> and H<sub>2</sub>O number densities in the illuminated volume becomes possible. To reduce statistical noise in the signals, these are temporally averaged over 24 s, which corresponds to a 5.6 km distance between neighbouring profiles. In this study, O<sub>3</sub> and H<sub>2</sub>O is determined every 15 m in the vertical although it has to be mentioned that the effective vertical resolution of the data is 500 m (full width at half maximum (FWHM) of the averaging kernel) and exactly the same for O<sub>3</sub> and H<sub>2</sub>O. The observed number density from the DIAL is converted to volume mixing ratios (VMR) using profiles of temperature and pressure typically taken from numerical weather prediction models (see Sect. 2.3). For a detailed characterization and validation of the instrument, the interested reader is referred to Wirth et al. (2009) and Fix et al. (2019). Note that throughout ~~this the present~~ study H<sub>2</sub>O VMR is given as ppm which is equivalent to 10<sup>-6</sup> mol mol<sup>-1</sup> or  $\mu\text{mol mol}^{-1}$  and O<sub>3</sub> VMR uses ppb which is equivalent to 10<sup>-9</sup> mol mol<sup>-1</sup> or nmol mol<sup>-1</sup>.

## 2.2 Tracer-tracer correlation

One of the key methods that is applied here is the presentation of the lidar data in T-T space, which is a well-established method to investigate the chemical transition in the ExTL (Hintsa et al., 1998, Fischer et al., 2000, Zahn and Brenninkmeijer, 2003). When the concentration of a trace gas with its main sources in the stratosphere is displayed in relation to the concentration of another trace gas with its main sources in the troposphere, in the idealized situation of no mixing, this T-T correlation method shows a L-shaped distribution with two characteristic branches of nearly linear relationships for the tropospheric and the stratospheric branch, respectively (e.g. Hoor et al., 2002; Pan et al., 2004). Such L-shaped distributions, in case of H<sub>2</sub>O and O<sub>3</sub>, typically occur in the tropics, where cross-tropopause mixing is weak and where slowly ascending tropospheric air masses are efficiently dehydrated at the cold tropical tropopause (Hegglin et al., 2009; Pan et al., 2014b; Pan et al., 2018). In the midlatitudes, where many of the above listed STE processes occur, observations show transition states aligned along so-called “mixing lines” between the two branches, which represent a chemical signature from the stratosphere and the troposphere and connect both. The slope of the linear mixing lines critically depends on the concentration of the initial air masses in troposphere and stratosphere that are involved in the mixing process (Hoor et al., 2002). Photochemistry may lead to curved mixing lines (Hoor et al., 2002).

Several studies ~~analysed the depth and composition of the ExTL displaying using~~ -multi-flight in situ or satellite data ~~sets in the ExTL in T-T space see Sect. 1~~ which showed compact regions of mixing lines in T-T space that allowed ~~to delineate~~ the mixing layer to be delineated (e.g. Pan et al., 2007). The compactness of the mixing lines may be explained by the rather weak variability of the tropospheric and stratospheric trace gas concentrations that are connected by the mixing lines on time scales of individual research campaigns or seasons (Hegglin et al., 2009). This allowed a statistical investigation of the ExTL depth and composition, although the individual flights may have covered various dynamical situations and air masses of different origin (e.g. Pan et al., 2004; Hoor et al., 2004; Hegglin et al., 2009). ~~Pan et al. (2004) found increased ExTL sharpness with increasing latitude and the ExTL being centred on the thermal tropopause. Hoor et al. (2004) showed that the influence of STE decreases with horizontal and vertical distance from the tropopause and that the ExTL closely follows the tropopause. They also found a weak seasonality in STE with the ExTL reaching up to 30 K above the local tropopause in summer when isentropic PV gradients are weak and STE is intensified. The climatological analysis by Hegglin et al. (2009) shows an increase of ExTL depth above the thermal tropopause with latitude, increasing from 1–1.5 km in the subtropics to 3–4 km in the northern hemispheric polar regions. Pan et al. (2007) found that the choice of the tropopause definition results in a different interpretation of the STE influence on the troposphere and stratosphere.~~

Hoor et al. (2004) found distinct mixing lines for particular flights as a result of individual synoptic situations. Pan et al. (2014b) mention that a combined analysis in T-T and geometrical space with dynamical information can provide the information required to identify the location of the transition in relation to the dynamical structure associated with the air mass boundary. This combined approach was used to locate mixed, stratospheric and tropospheric air masses along selected flight legs crossing the ExTL horizontally and vertically (Pan et al., 2007; Vogel et al., 2011; Konopka and Pan, 2012). However, a detailed attribution of mixing lines to locations in geometrical space and an isentropic investigation was so far limited by the reduced information content of staggered in-situ legs.

A prerequisite for the T-T method is that the distributions are controlled by transport processes i.e. that the lifetime of the used trace gases is longer than the timescale of transport and mixing at the tropopause, which is in the order of weeks. Different trace gases were used; for example, carbon monoxide (CO) as tropospheric tracer in combination with O<sub>3</sub> as stratospheric tracer (e.g. Hoor et al., 2002). In this study O<sub>3</sub>-H<sub>2</sub>O correlations are applied. Pan et al. (2007) discuss the applicability of O<sub>3</sub>-H<sub>2</sub>O correlations and note that H<sub>2</sub>O is a suitable tropospheric tracer despite the fact that it is not perfectly long-lived as phase changes may cause non-conservation of the gas phase H<sub>2</sub>O concentration. As discussed in Hegglin et al. (2009), the exponential decrease of H<sub>2</sub>O across the tropopause makes it a very useful source of information about transport into the stratosphere as even small amounts of H<sub>2</sub>O become visible as signature of increased H<sub>2</sub>O. In the stratosphere, methane oxidation can produce H<sub>2</sub>O which is, however, rather small in the LS and therefore often neglected (Pan et al., 2014b). Due to the large dynamic range of H<sub>2</sub>O of four orders of magnitude from the troposphere to the stratosphere, T-T depictions use the H<sub>2</sub>O data is displayed in a logarithmic scaling for H<sub>2</sub>O to be able to distinguish the mixing lines (e.g., Hegglin et al., 2009; Tilmes et al., 2010), which are typically curved in lin-log T-T diagrams, more easily.

Stratospheric and tropospheric background distributions are usually selected in T-T space by defining case-dependent threshold concentrations. One method uses thresholds e.g. H<sub>2</sub>O ≤ 5 ppm to select the stratospheric branch and O<sub>3</sub> ≤ 65 ppb for the tropospheric branch in combinations with linear fits to the selected data in the two branches (Pan et al., 2004; Pan et al., 2007). Data points outside the 2σ level of both branches are considered to be mixed air masses. In a more simple less sophisticated approach, Pan et al. (2014b) used probability density functions of the observations to separate undisturbed background from mixed air masses. The choice of the thresholds for the background distributions and the used combination of trace gases may impact the ExTL determination of the ExTL depth and also depend on the data set in terms of where and when during the year it was obtained (Hegglin et al., 2009; Tilmes et al., 2010). Woiwode et al. (2019) used two-dimensional 2D passive remote sensing data with fixed thresholds to determine mixed air masses from T-T correlations of H<sub>2</sub>O and O<sub>3</sub>, however, did not give further detail about the composition of the ExTL. In this present study the selection is done using a combined view of T-T and geometrical distributions

~~which is only possible from the collocated lidar measurements~~ to come as close as possible to a correct identification of mixed, stratospheric and tropospheric air masses.

## 2.3 Meteorological data

Unfortunately, no collocated profile observations of wind and temperature are available providing a similar resolution and coverage as the DIAL data. In order to put the observational data in the context of the dynamical situation we use one-hourly meteorological reanalysis fields from the European Centre for Medium-Range Weather Forecasts (ECMWF) ERA-5 data set (Hersbach et al., 2020) retrieved on a 0.5/0.5 degree grid with 137 vertical levels. The reanalysis fields were interpolated bilinearly in space and linearly in time towards the observation location (Schäfler et al., 2010). Note that the vertical separation of model levels in the tropopause region is about 300 m (e.g. Schäfler et al., 2020). The main parameters of interest are wind speed to identify the jet stream, ~~potential vorticity for the location of the dynamical tropopause as well as~~ pressure and potential temperature for the vertical context as well as potential vorticity (PV). Please note that 2 PVU are used for locating the dynamical tropopause. Although analyses from numerical weather prediction models have significantly improved in the past, it is well-known that dynamic and thermodynamic quantities show uncertainties especially in regions of strong vertical gradients, i.e. the tropopause (e.g. Schäfler et al. 2020). However, it is deemed sufficient to provide the large-scale dynamical context that is relevant to interpret the observations. Additionally, error sources resulting from temporal and spatial interpolation are neglected.

## 3 O<sub>3</sub> and H<sub>2</sub>O observations on 1 October 2017

### 3.1 The synoptic setting

During the WISE campaign, a total of 17 flights were conducted over the eastern North Atlantic Ocean and western Europe with HALO out of Shannon, Ireland between 13 September and 21 October 2017. Collocated O<sub>3</sub> and H<sub>2</sub>O DIAL measurements were made in a number of meteorological situations including several crossings of extratropical jet streams and tropopause folds, multiple high-altitude observations of warm conveyor belts (WCB) outflows, i.e. strongly ascending tropospheric air streams reaching the tropopause (Browning et al., 1973; Wernli and Davies, 1997) and several crossings of filamentary structures in occluded frontal systems; i.e. typical phenomena related to breaking Rossby waves. A case study on in situ observations above a WCB outflow is discussed in Kunkel et al. (2019).

Here, we focus on one particular case on 1 October 2017 that was characterized by a straight south-westerly jet stream over the North Atlantic Ocean (Fig. 1a) located between a large-scale longwave trough over the western Atlantic and a ridge extending over

the North Sea into Southern Scandinavia (Fig. 1b). Two surface cyclones evolved in the upstream trough (L1 and L3 in Fig. 1) that feature typical cyclonic cloud patterns at 400 hPa, which are indicative ~~offer~~ vertical transport of tropospheric air ahead of the trough. Further downstream, a surface cyclone was located between the UK and Iceland (L2) and another surface low (L4) is visible over the central North Atlantic south of the strong jet stream. The 350 K ~~potential vorticity (PV)~~ distribution intersects with the jet stream that follows the maximum gradient in PV (Martius et al. 2010) and separates stratospheric air ( $> 2$  ~~Potential Vorticity Units~~ ( $\text{PVU} = 10^{-6} \text{ K m}^2 \text{ kg}^{-1} \text{ s}^{-1}$ )) north of the wind speed maximum from tropospheric ~~air~~ ( $< 2$  PVU) to its south. In this region of strong horizontal and vertical velocity gradients and neighboring air masses of different origin, isentropic mixing was expected to have influenced the ExTL. The synoptic pattern was found to be relatively persistent over the preceding hours. Stratospheric air was transported all around the subtropical anticyclone keeping its high levels of PV in contrast to the tropospheric low-PV air that was advected northeastward on the leading edge of the upstream longwave trough filling the center of the anticyclone (Fig. 1a).

HALO performed a flight between 12:04 and 21:57 UTC that aimed at observing predicted strong tracer gradients and mixing across the jet stream using both, in situ and remote sensing instrumentation. Multiple, almost perpendicular crossings of the jet stream at  $13^\circ$  W and  $15^\circ$  W were performed along a rectangular-shaped flight pattern at different altitudes for in situ (FL 280, FL 410, FL 430) and remote sensing measurements (FL 450,  $\sim 14$  km). In this study, we concentrate on the last jet stream transect at  $13^\circ$  W from 18:40 to 20:00 UTC (green line in Fig. 1) only, providing maximum data coverage beneath the aircraft at FL 450. As this study focusses on processes in the jet stream, the northern- and the southernmost part of the ~~zonal-meridional~~ flight track were omitted.

In those parts of the flight, either air mass transport in the occluded cyclone L2 or older stratospheric air that was advected around the upper-level anticyclone (Fig. 1a) were encountered which are not relevant for this study. On the considered transect between  $50.5^\circ$  N and  $60.5^\circ$  N HALO crossed a zonally extended cloud band related to cyclone L4 (see Fig. 1b ~~and Fig. 2~~) which coincides with the jet axis on the northern side of the clouds ~~(Fig. 2)~~.

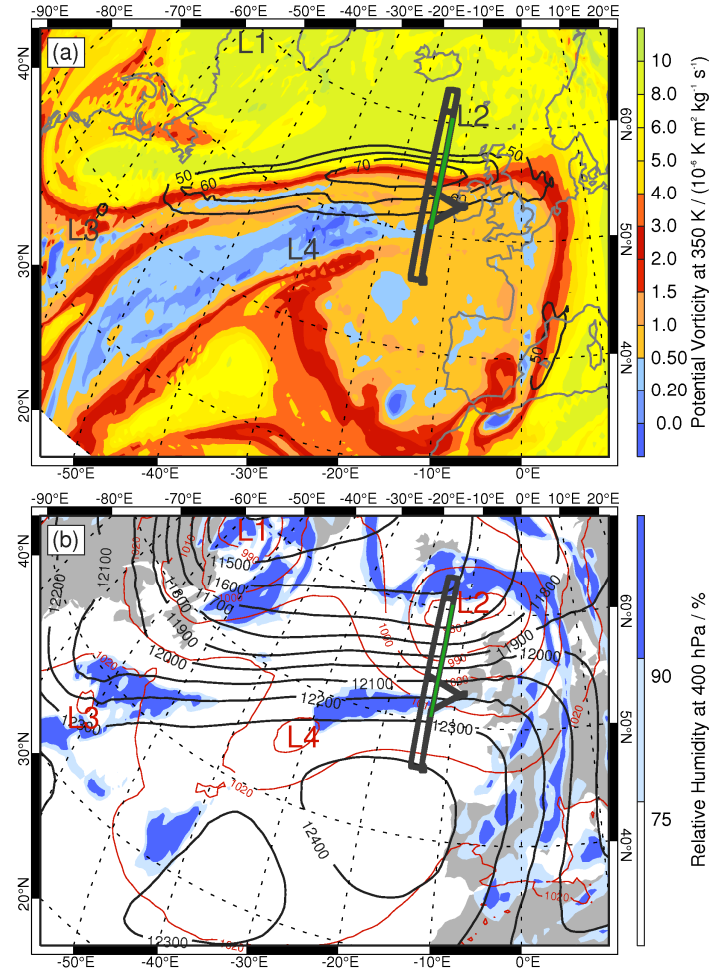

**Figure 1:** (a) Potential vorticity (in colours,  $10^{-6} \text{ K m}^2 \text{ kg}^{-1} \text{ s}^{-1} = 1 \text{ PVU}$ ) and horizontal wind speed (black contour lines, in  $\text{m s}^{-1}$  for  $> 50 \text{ m s}^{-1}$ ) at 350 K. (b) Relative humidity at 400 hPa (colours, in %), geopotential height at 150 hPa (black contour lines, in m) and surface pressure (red contour lines, in hPa) as represented in the ECMWF operational analysis on 1 October 2017, 18 UTC. L1–L4 mark the location of surface cyclones. (a) and (b) are superimposed by the HALO flight track (12:05–21:57 UTC, thick black line) and the subsection from 18:40 to 20:00 UTC (green line) that is discussed in this paper.



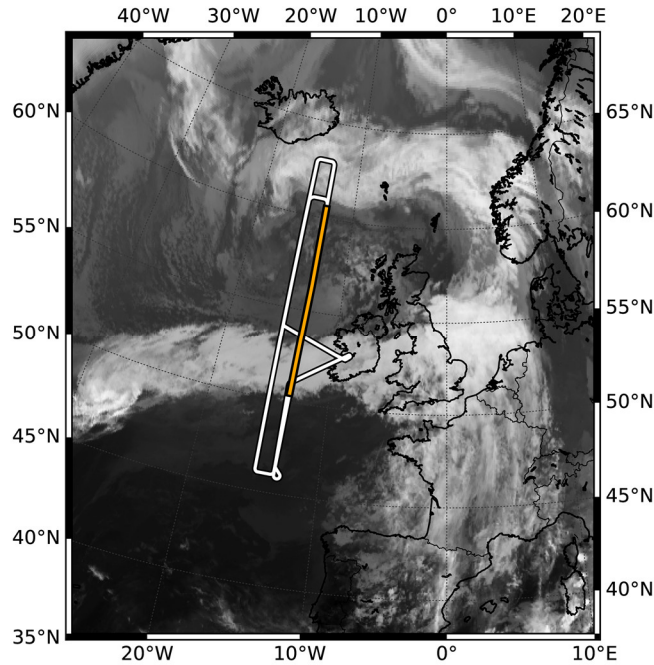

**Figure 2:** Meteosat SEVIRI infrared satellite image ( $10.8 \mu\text{m}$ ) for 1 October 2017, 18 UTC superimposed by the HALO flight track (12:05–21:57 UTC, thick black line) and the subsection from 18:40 to 20:00 UTC (orange line). Copyright 2020 EUMETSAT.

### 3.2 $\text{O}_3$ and $\text{H}_2\text{O}$ along the observed cross-sections

Figure 3 shows the observed distributions of  $\text{H}_2\text{O}$  and  $\text{O}_3$  along the above described  $\sim 1100$  km long meridionally oriented cross-section between 18:40 and 20:00 UTC comprising a total of 200 lidar profiles that are shown for an altitude range between 23.5 and 14 km. In the first 400 km, the dynamical tropopause (2 PVU) is located at altitudes between 7.5 and 8.5 km before it slopes down to about 5 km altitude. At about half of the flight leg, a steep ascent of the dynamical tropopause is accompanied by tropospheric air masses reaching altitudes up to  $\sim 14$  km further south. The stratospheric air is characterized by increased static stability as visible from the increased vertical potential temperature gradient. Westerly jet stream winds with maximum wind speeds up to  $90 \text{ m s}^{-1}$  at 9 km altitude and strong horizontal and vertical wind speed shear blow perpendicular to the flight track. Isentropes intersect the dynamical tropopause between 314 and 366 K of which the lowest ones extend downward in association with folding of the tropopause which is typically initiated by ageostrophic circulation around the jet stream causing an intrusion of stratospheric air (Keyser and Shapiro, 1987).

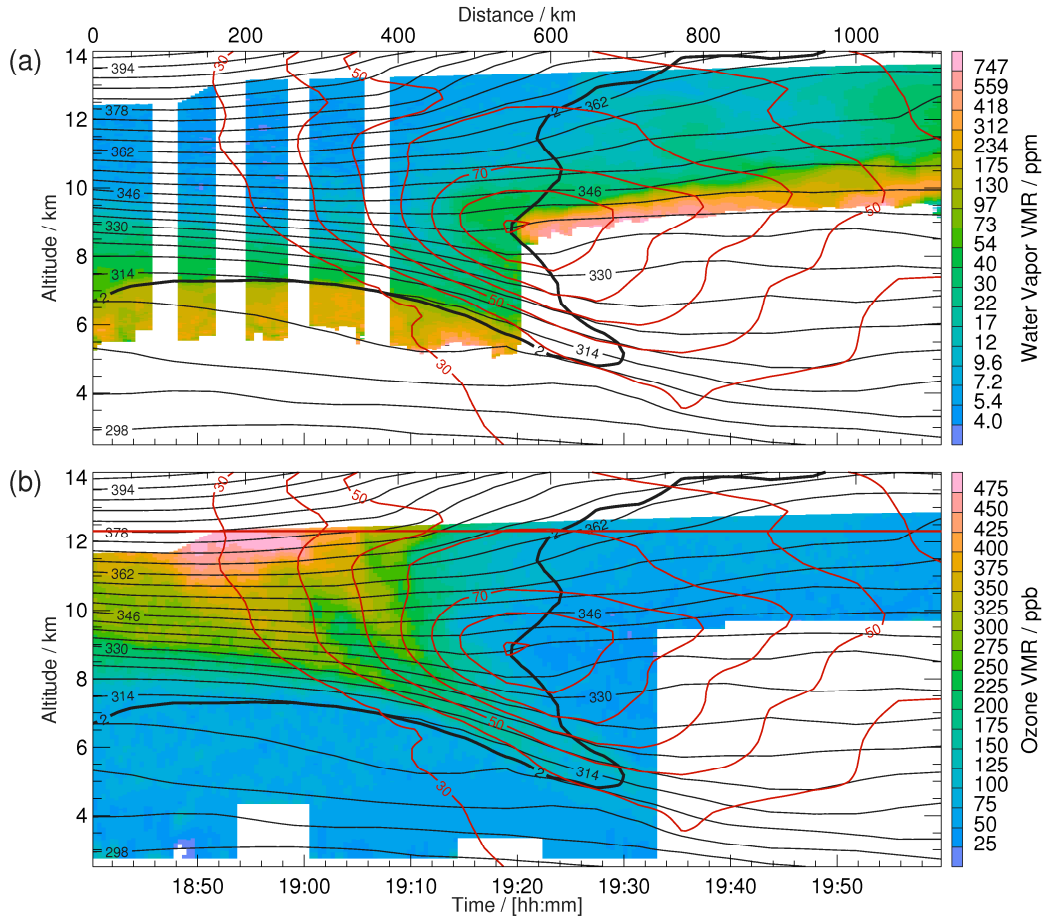

**Figure 3:** DIAL observations (in colours) of (a) H<sub>2</sub>O volume mixing ratio (VMR, in ppm =  $10^{-6}$  =  $\mu\text{mol mol}^{-1}$ ) and (b) O<sub>3</sub> VMR (in ppb =  $10^{-9}$  =  $\text{nmol mol}^{-1}$ ) on 1 October 2017 (see Fig. 1 for the flight track). (a) and (b) are superimposed by horizontal wind speed (red contours, in m/s for wind speeds > 30 m s<sup>-1</sup>) potential temperature (black contours, in K) and dynamical tropopause (2 PVU, thick black contour) interpolated from one-hourly ECMWF ERA-5 reanalyses.

H<sub>2</sub>O shows the lowest VMRs (3–7 ppm) at the highest potential temperature in the stratosphere which are typical values for autumn in the lowermost stratosphere (e.g. Zahn et al., 2014). In contrast, the highest H<sub>2</sub>O VMRs occur in the troposphere to the north and south of the jet stream ranging from ~100 to 1000 ppm. The moist tropospheric air north of the jet stream is relatively well-mixed and provides typical autumnal values for the upper troposphere of 100–300 ppm. The high-reaching tropospheric air to the south of the jet stream is ~~much~~ more stratified. H<sub>2</sub>O quickly decreases above a shallow (1–1.5 km) moist layer (100–1000 ppm) in the lowest

part. The highest H<sub>2</sub>O VMRs are indicative ~~offer~~ recent vertical transport (e.g., in WCBs) from the moist lower troposphere (Zahn et al., 2014). Furthermore, the stratification and some filamentary structures with enhanced H<sub>2</sub>O at upper levels suggest differential transport impacting the distribution of the upper-tropospheric air. The lowest H<sub>2</sub>O VMR (10–40 ppm) at the highest levels and the exceptionally high dynamical tropopause and potential temperatures are indicative ~~offer~~ transport from the subtropical or tropical UT. Missing data below the moist layer stems from mid-level clouds (see Fig. 1b and 2) while, in the first half of the flight, the data gap below ~5.5 km results from ~~reduced energy and~~ attenuation of the laser signal in lower and moister air. Vertical stripes of missing H<sub>2</sub>O data are the result of cooling issues intermittently occurring at high flight altitudes with high potential temperatures. In addition, observed O<sub>3</sub> values represent typical concentrations for the season (c.f. Krebsbach et al., 2006). In contrast to H<sub>2</sub>O, highest O<sub>3</sub> (O<sub>3</sub> VMR of 300–500 ppb) was measured in the lowermost stratosphere (LMS) with a strong decrease towards lower altitudes and the south. Although the region of highest O<sub>3</sub> is relatively compact, it shows large inhomogeneity on smaller scales with two filamentary structures of increased VMR extending across isentropes towards the intrusion located below the jet stream where air is adiabatically transported towards the ground. In the troposphere, O<sub>3</sub> is comparatively low (20–100 ppb) with the lowest values occurring in the mid-troposphere ~~ic moist air~~ to the south of the jet stream being indicative ~~offer~~ recent transport from the lower troposphere. The tropopause fold redistributes O<sub>3</sub> and H<sub>2</sub>O with O<sub>3</sub> decreasing and H<sub>2</sub>O increasing at its sides.

Note that only collocated data along the cross-section is used in the following T-T diagnostics which covered the lower stratosphere north of the jet stream and a part of the upper troposphere on both sides. Therefore, it is well suited to investigate the ExTL. Note that due to the presence of clouds no collocated observations are available in the lower part of the tropopause fold.

~~The characteristic opposite behaviour of O<sub>3</sub> and H<sub>2</sub>O in the ExTL is particularly visible in Fig. 4 showing individual profiles in the northern part of the flight before 19:18 UTC. Profiles are shown in tropopause relative coordinates (e.g. Birner, 2002) which pronounces the tropopause based trace gas gradients (Hoor et al., 2004) as the dynamical tropopause slightly decreases southward. Between 18:50 and 19:08 UTC (bluish profiles) tropospheric H<sub>2</sub>O and O<sub>3</sub> VMRs are relatively constant with height and range between 100 and 300 ppm for H<sub>2</sub>O and 50 and 100 ppb for O<sub>3</sub>. H<sub>2</sub>O VMRs decline above the tropopause to LMS background values (3–7 ppm) at 3 km above the tropopause. O<sub>3</sub> instead steadily increases above the dynamical tropopause. It is the 2 km thick transition region above the tropopause that provides intermediate characteristics between stratosphere and tropospheric values of O<sub>3</sub> and H<sub>2</sub>O which is indicative for mixed air masses in the ExTL. When approaching the jet stream (greenish profiles, 19:08 to 19:18 UTC) higher H<sub>2</sub>O VMR with increased variability and corresponding lower O<sub>3</sub> VMR suggest the influence of mixing processes in this altitude range.~~

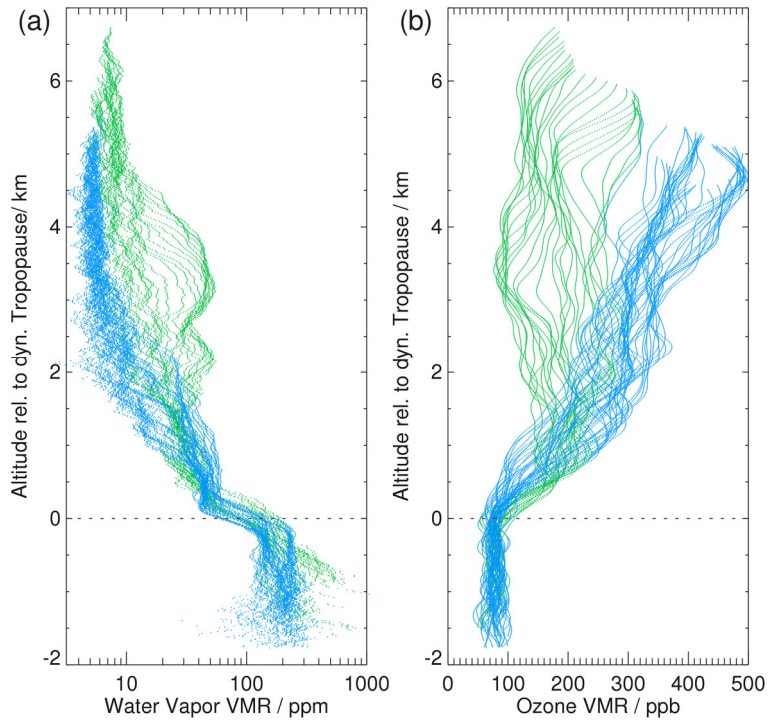

**Figure 4:** Profiles of (a)  $\text{H}_2\text{O}$  and (b)  $\text{O}_3$  VMR relative to the dynamical tropopause (2 PVU). Blue dots show profiles for the time period 18:40 to 19:08 UTC and green dots for 19:08 to 19:18 UTC for collocated data along the cross section in Fig. 3.

### 3.3 $\text{O}_3$ and $\text{H}_2\text{O}$ as tracer-tracer correlations

In T-T space, the collocated  $\text{O}_3$  and  $\text{H}_2\text{O}$  lidar measurements (Fig. 54a) form an L-shaped distribution with an arc-shaped transition in-between which immediately highlights that the DIAL observations are suited to distinguish stratospheric, tropospheric and mixed air masses. ~~Note that the non linear shape of the mixing lines results from the logarithmic scale of  $\text{H}_2\text{O}$ , which was also observed in other studies using  $\text{H}_2\text{O}$ – $\text{O}_3$  correlations (Hegglin et al., 2009).~~ In order to better characterize the partly superposed measurements, Fig. 45b shows the number of observations contributing to individual bins in the T-T diagram.  $\text{O}_3$  values of less than  $\sim 100$  ppb allow give a first rough depiction of the *tropospheric branch* that holds variable  $\text{H}_2\text{O}$  with VMRs covering four orders of magnitude and featuring two maxima between 10 and 40 ppm and 100 and 300 ppm. The *stratospheric branch* is immediately identified by  $\text{H}_2\text{O}$  observations with VMR of less than  $\sim 7$  ppm. In between both branches, collections of mixing lines form compact traces with increased numbers of observations that will be called mixing regimes in the following. The arc-shaped mixing regime, that is split

in two traces at higher ozone concentrations, connects stratospheric O<sub>3</sub>VMRs of 250–350 ppb with tropospheric H<sub>2</sub>O VMRs of 30–70 ppm. Interestingly, an area to the right of this arc-shaped mixing regime with a low number of observations suggests mixing between already mixed air and more humid (H<sub>2</sub>O VMR of 100–200 ppm) tropospheric air. The lower left area in T-T space, connecting very dry tropospheric air (H<sub>2</sub>O VMR of 8–15 ppm) and ozone-rich stratospheric air (O<sub>3</sub>VMR > 250 ppb) is less obvious as it may be part of the dry and ozone-poor stratospheric branch typically originating from low-latitudes (e.g. Tilmes et al., 2010) or it may be related to mixing of dry subtropical tropospheric air with ozone-rich stratospheric air. The former appears less likely, as climatological mid-latitude distributions show such pure stratospheric air masses at very low H<sub>2</sub>O only during northern hemispheric winter (Hegglin et al., 2009). Additionally, H<sub>2</sub>O is slightly increased compared to the stratospheric background with H<sub>2</sub>O VMR of 4–7 ppm (c.f. Zahn et al., 2014) leading to a somewhat reduced slope compared to the stratospheric branch. Please note that the above diagnosed tropospheric and stratospheric entry VMRs represent typical values with respect to climatology (Hegglin et al., 2009). Based on these findings, Fig. 5e-4c introduces a classification of the observed air masses solely based on their location in T-T space for this instantaneous jet stream cross-section. The light blue area covers the stratospheric branch (STRA) with VMR O<sub>3</sub> > 280 ppb and VMR H<sub>2</sub>O < 7 ppm. The tropospheric branch is subdivided into three classes with slightly varying O<sub>3</sub> thresholds depending on the measurement frequencies in Fig. 45b. TRO-1 represents the driest tropospheric air (VMR H<sub>2</sub>O < 30 ppm), TRO-2 the intermediate air mass (30 ppm < VMR H<sub>2</sub>O < 100 ppm) and TRO-3 the moistest air mass (VMR H<sub>2</sub>O > 100 ppm). Table 1 summarizes the applied thresholds to detect tropospheric and stratospheric air. The three above discussed mixing regimes are coloured in dark green (MIX-1), green (MIX-2) and light green (MIX-3) and connect the stratospheric branch with different parts of the troposphere. The threshold between TRO-1 and TRO-2 was adapted to represent the tropospheric end of transitions within MIX-1 and MIX-2. The distribution of these air mass classes in geometrical space are further detailed in Sect. 3.4.

**Table 1:** Thresholds used for air mass classification of tropospheric and stratospheric air in T-T space (see also Fig. 54).

| Class | O <sub>3</sub> / ppb | H <sub>2</sub> O /ppm |
|-------|----------------------|-----------------------|
| STRA  | > 280                | < 7                   |
| TRO-1 | < 90                 | 10 - 30               |
| TRO-2 | < 80                 | 30 - 100              |
| TRO-3 | < 100                | > 100                 |

Figure 56 shows mean and variability of pressure, potential temperature and PV for each bin in the T-T diagram. STRA provides low pressures and high potential temperatures that decrease towards lower O<sub>3</sub> which corresponds to vertically decreasing O<sub>3</sub> values (Fig. 3b). The increased variability in pressure at lower O<sub>3</sub> VMRs within STRA can be explained by the additional latitudinal decrease of O<sub>3</sub> at the highest altitudes (low potential temperatures). The dry tropospheric air mass TRO-1 also provides low pressure and high potential temperature. Conversely, TRO-2 and TRO-3 possess higher pressure and lower potential temperature. The lowest tropospheric O<sub>3</sub> corresponds to ~~tropospheric and ozone poor~~ air at ~8–10 km on the southern side of the jet stream. Towards higher O<sub>3</sub>, pressure increases (potential temperature decreases) within TRO-2 and TRO-3 accompanied by increased variability which corresponds to ~~tropospheric~~ observations at different altitudes on the northern and southern side of the jet stream. MIX-1 features low pressures ~~connecting TRO-1 and STRA~~ indicating that the transition occurred at high levels. High and relatively constant potential temperatures suggest an isentropic mixing regime within MIX-1. The lower the pressure (the higher the potential temperature) within MIX-1 the lower the H<sub>2</sub>O concentration was which is expectable due to vertically decreasing tropopause temperatures that define the ExTL moisture when mixed across the jet stream (e.g. Zahn et al., 2014). Within MIX-2, pressure and its variability increase towards the tropospheric branch while potential temperature decreases. The higher the altitude (higher potential temperature and lower pressure), the lower the H<sub>2</sub>O VMR and O<sub>3</sub> VMR were observed in MIX-2. The area within MIX-2 that shows as separated and rather linear trace (Fig. 54b) features highest potential temperature and lowest pressure. MIX-3 occurs at low potential temperatures and higher pressures.

Figure 56c shows the distribution of PV which is a tracer for stratospheric air comparable to O<sub>3</sub> as it has comparable gradients across the tropopause with high values in the stably stratified stratosphere (e.g. Shapiro, 1980). ~~PV is conserved in adiabatic motions. However, diabatic processes such as cloud condensation, radiation or turbulent mixing impact the PV distribution (Spreitzer et al., 2019).~~ As expected, PV is highest in STRA and strongly decreases along the mixing regimes with decreasing O<sub>3</sub>. The mixed air masses show PV values between 2 and 7 PVU. Furthermore, PV is found to be variable within the regimes in the ExTL. Therefore, it is assumed that the interrelation of the dynamical and chemical transition depends on altitude (potential temperature), a circumstance that will be discussed in more detail in Sect. 3.5. Lowest PV values are correlated with low O<sub>3</sub> values in the troposphere indicating more recent transport from the lower troposphere.

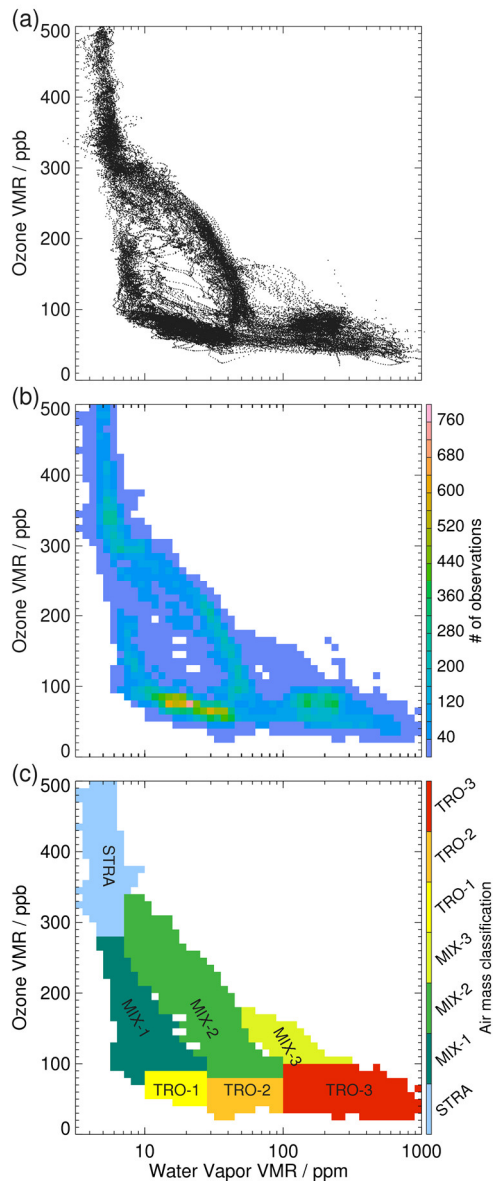

**Figure 45:** Tracer-tracer (T-T) correlations of  $O_3$  and  $H_2O$  for the collocated DIAL data on 1 October 2017. (a) All collocated observations, (b) number of data points and (c) air mass classification for bins in T-T space (bin sizes of 10 ppb for VMR  $O_3$  and 0.05 of  $\log_{10}(\text{VMR } H_2O/\text{ppm})$ ).

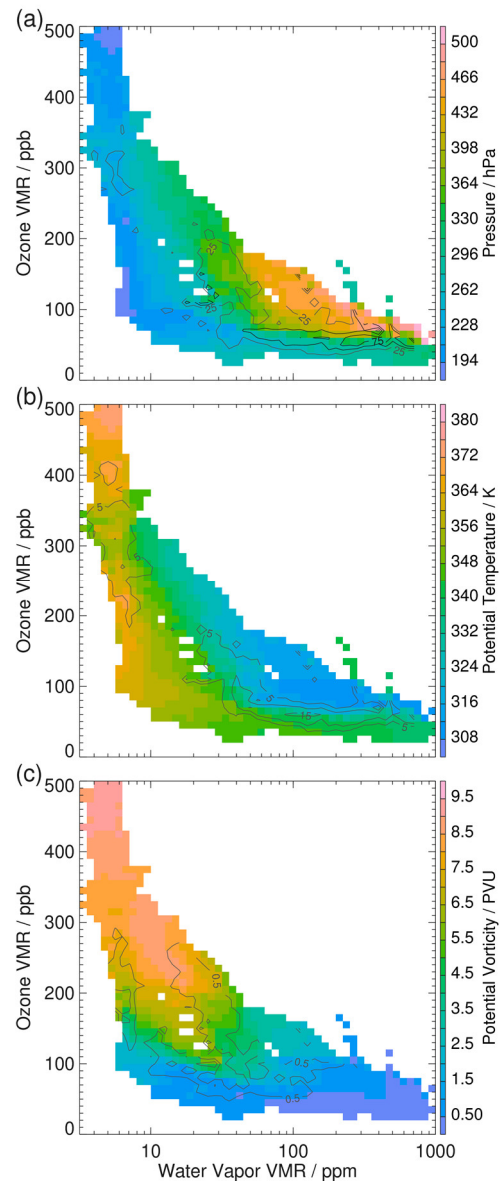

**Figure 56:** T-T correlation as in Fig. 5e4b but for mean (in colours) and standard deviation (grey contours) of (a) pressure, (b) potential temperature and (c) potential vorticity.



410 **3.4 A combined view of O<sub>3</sub> and H<sub>2</sub>O in T-T and geometrical space**

A back projection of the air mass classification from T-T space (Fig. 45c) into geometrical space along the cross-section gives more detailed information on the shape and composition of the ExTL (Fig. 67a). First, it is striking that the different air masses correspond to remarkably coherent areas along the cross-section. The mixed air masses in the ExTL (MIX-1, MIX-2 and MIX-3) reach about ~30 K above the tropopause in the northern part before they ascend with the rising tropopause further to the south. MIX-1 occurs at highest altitudes in the upper part of the jet stream with its bottom being relatively well defined by the 348 K isentrope. MIX-1 connects STRA with TRO-1 (isentropic transition) which underlines the validity of considering MIX-1 as being mixed air instead of stratospheric background. The relatively constant potential temperature along the mixing regime (Fig. 56b) suggests the relevance of mixing processes in the upper-part of the jet stream, i.e. a region known for turbulence induced exchange between neighbouring air masses (Shapiro, 1980).

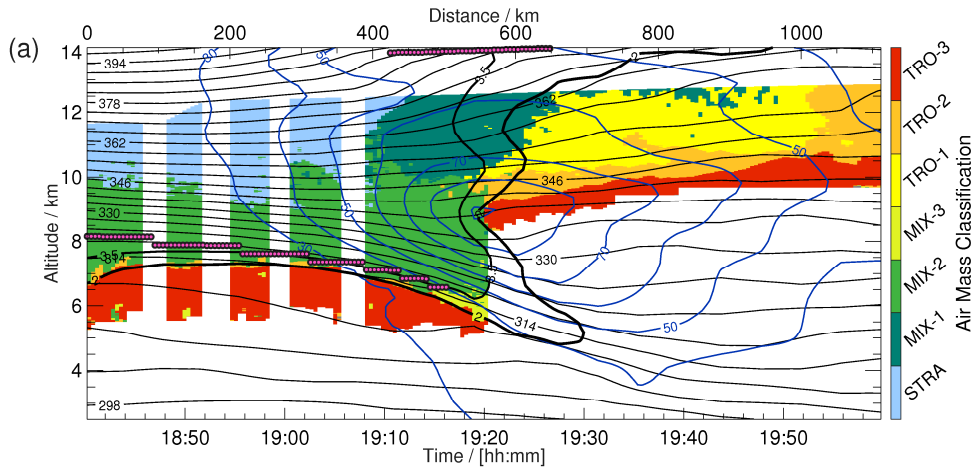

420 **Figure 76:** (a) Collocated observations coloured by (a) the air mass classification in Fig. 54c. and (b) the mixing factor diagnostic as shown in Fig. 8a (for details see text). Superimposed model information as in Fig. 3 with an additional contour for 3.5 PVU. Pink circles mark the thermal tropopause according to the temperature lapse rate criterion (WMO, 1957)

Below, MIX-2 comprises isentropic transitions of STRA with TRO-2 and TRO-3 above the clouds in the troposphere as well as cross-isentropic vertical transitions in the northern part of the flight between STRA and TRO-3. In the northern part of the flight section, the bottom of the ExTL (MIX-2) agrees with the dynamical tropopause while the thermal tropopause lies within the ExTL and approximately follows the 3.5 PVU contour. Please note that the thermal tropopause provides a typical split structure near the jet stream while the dynamical tropopause proceeds vertically (e.g. Randel et al., 2007). which confirms



findings by Pan et al. (2007). Near the jet stream, the agreement of the almost vertical dynamical tropopause and the border to the tropospheric air (TRO 1–3) is ~~not as~~ less uniform and TRO-1 and TRO-2 air masses reach into areas north of the dynamical tropopause. MIX-3 occurs in the lowest observed part of the intrusion that was observed before reaching the clouds. The geometrical location points to mixing processes between mixed ExTL air masses and the TRO-3 air mass below in the lower part of the jet stream. Note that the 348-K isentrope also separates TRO-1 from TRO-2 in the tropospheric air, which points to different source regions of humidity in the troposphere. Stratospheric air (STRA) is located at the highest altitudes and in the most northern part.

To further investigate the structure and strength of stratosphere to troposphere transitions within the ExTL, the concept of the mixing degree metric firstly introduced by Kunz et al. (2009) is advantageous. It is a measure of how much an air mass deviates from the background due to mixing in its previous history and is solely based on the location of the observed air mass in T-T space. Here, we adapt this concept to a mixing degree metric is adapted to the lidar data which was initially introduced for in situ observations by Kunz et al. (2009). In that publication, the mixing degree is a measure of how much mixed air masses deviate from the background due to mixing in their history. It is solely based on the location of the observed air mass in T-T space and increases with distance from the undisturbed stratospheric and tropospheric background and with distance from the intersection point of the two branches. Here, a comparable mixing factor is determined, however, u, but unlike Kunz et al. (2009), the herein presented mixing factor is only a function of distance from the undisturbed stratospheric and tropospheric background. It does not account for the distance to the intersection point of tropospheric and stratospheric branches as a mixing event is not considered to be stronger in case the tropospheric H<sub>2</sub>O VMR and stratospheric O<sub>3</sub> VMR are increased. At first, dimensionless variables x and y are calculated from the VMR H<sub>2</sub>O and VMR O<sub>3</sub> with  $x = \frac{(\log(H_2O) - \log(H_2O_{MIN}))}{(\log(H_2O_{MAX}) - \log(H_2O_{MIN}))}$  and  $y = \frac{(O_3 - O_{3,MIN})}{(O_{3,MAX} - O_{3,MIN})}$

$$x = \frac{(\log(H_2O) - \log(H_2O_{MIN}))}{(\log(H_2O_{MAX}) - \log(H_2O_{MIN}))} \text{ and } y = \frac{(O_3 - O_{3,MIN})}{(O_{3,MAX} - O_{3,MIN})}$$

using the thresholds H<sub>2</sub>O<sub>MIN</sub> = 6.5 ppm, H<sub>2</sub>O<sub>MAX</sub> = 1000 ppm, O<sub>3,MIN</sub> = 90 ppb and O<sub>3,MAX</sub> = 500 ppb to select the mixed air mass. The observations with lower VMR than this range are considered to be unmixed tropospheric and stratospheric air. In order to range from 0 (pure stratospheric air) to 1 (pure tropospheric air) the mixing factor f is calculated for x > y as f = 1 - (0.5\*(y/x)) and for y < x as f = 0.5\*(x/y).

Figure 8.7a shows the observations color-coded by the mixing factor. Please note that ~~unlike the earlier presented air mass classification in T-T space~~ the selected ExTL air masses slightly differ from Fig. 4, ~~the due to the application of constant minimum threshold~~ thresholds are defined constant but the mixed air masses approximately correspond to each other in

geometrical space (c.f. Fig. 7). Within the ExTL the back projection of the mixing factor in Fig. 7b picks up the major transition regions in MIX-1 and MIX-2 and MIX-3. At the highest levels (above 350 K), i.e. directly above of the jet stream maximum winds, the isentropic transition is rather uniform, compared to in the layer beneath (340–350 K), rapid transitions result in a lack of observations with intermediate chemical characteristics. Below potential temperatures of 340 K, the transition is again more uniform. Within the tropopause fold air masses with intermediate chemical composition are transported towards the lower troposphere. The above described stratospheric filaments of high O<sub>3</sub> correspond to decreased mixing factors indicating stratospheric character of the observed air compared to the surroundings. Figures 6 and 7b suggest that both vertical (MIX-2) and isentropic transitions (MIX-1 and MIX-2) formed the mixing lines.

When the mixing factor is presented with respect to potential temperature (Fig. 8b) three different characteristic transitions appear. First, cross isentropic transitions between 310 and 340 K correspond to the vertical transitions in the first half of the flight i.e. transitions from TRO 3 via MIX 2 into STRA (see Fig. 5 and Fig. 7). Second, isentropic transitions appear between 350 and 365 K that correspond to high level isentropic transitions between STRA and TRO 1 via MIX 1. Rapid transitions at and above the level of the jet stream result in a lack of observations with intermediate chemical characteristics for potential temperature between 340 and 350 K. Third, transitions from mixed air to tropospheric air with increasing potential temperatures (325–340 K) are related to transitions in the upper part of the tropopause fold (see Fig. 7b). Figure 7 and 8 highlight the distribution of air masses as classified in T-T space and suggested that both vertical and isentropic transitions did occur. MIX 1 is characterized by isentropic transitions while MIX 2 is also influenced by vertical transitions.

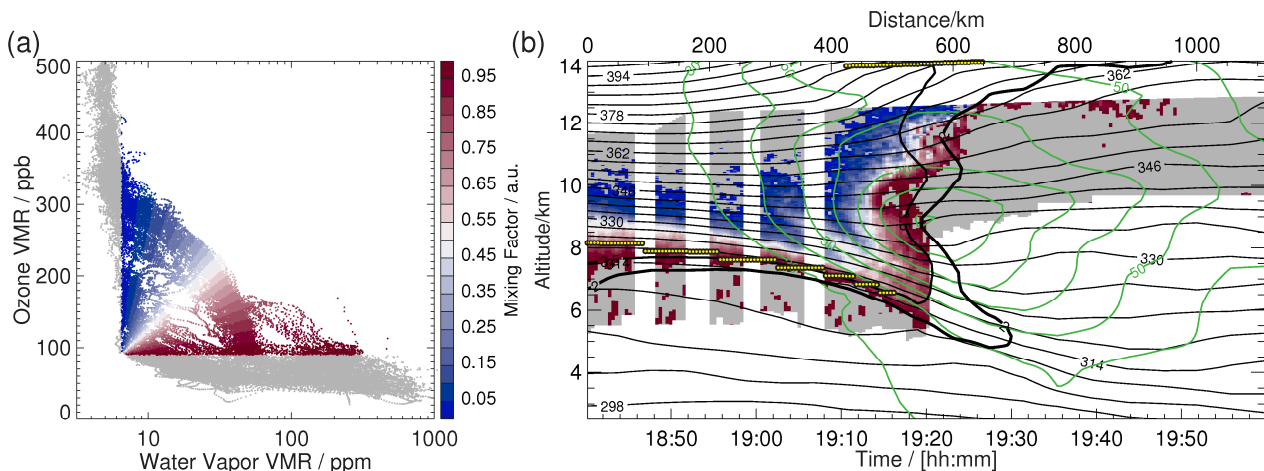

**Figure 78:** Mixing factor diagnostic for all collocated measurements in (a) T-T space using lower limits for H<sub>2</sub>O VMR of 6.5 ppm and for O<sub>3</sub> VMR of 90 ppb for selecting mixed air masses (for details see text) and in (b) projected back to geometrical space as a function of potential temperature and mixing factor.

Figure 89 shows how observations in certain subregions along the lidar cross-section become apparent in T-T distributions ~~which only becomes possible through the application of the novel collocated lidar data~~. Profiles before 19:00 UTC (Fig. 89a) represent vertical transitions in the first part of the flight that form transitions from high O<sub>3</sub> in the stratosphere along the arc-shaped mixed region in T-T space into TRO-3 (Fig. 9b8b). Within the ExTL (MIX-2) the mixing lines connect comparably high stratospheric O<sub>3</sub> (~300 ppb) with high tropospheric H<sub>2</sub>O (~50 ppm). The tropospheric air ~~is~~ is rather rich in O<sub>3</sub> and does not reach the highest levels of H<sub>2</sub>O within TRO-3. Fig. 9e-8c and d represent the layer 335 to 340 K between 19:00 and 19:45 UTC representing the above discussed rapid transition between tropospheric and ExTL air at the level of the jet stream maximum connecting TRO-3 and MIX-2. Both air masses are clearly separated in T-T space with H<sub>2</sub>O VMRs jumping from ~50 ppm at the tropospheric end of MIX-2 to ~500 ppm in TRO-3 (Fig. 9d8b) over a very short spatial distance (Fig. 9e8c) indicating minor mixing between both air masses. The more stratospheric part of MIX-2 follows the arc-shaped distribution while, the tropospheric part that is facing the jet stream is slightly detached (Fig. 9d8d), which potentially indicates different mixing processes within this particular layer. Interestingly, the layer directly above (340–347 K, Fig. 9e8e) that represents the transition of MIX-2 air with medium moist air in TRO-2 is still relatively abrupt but the discontinuity occurs within the ExTL (Fig. 9f8f), i.e. between the linear-shaped stratospheric part and the tropospheric end, suggesting some in-mixing of TRO-2 air into this layer. The location of these abrupt transitions in the two layers between 337 K and 347 K occur at the same spatial location (c.f. Fig. 77b). Both layers do not reach far into the LMS. ~~Note that due to mixing along its Lagrangian history it may be that the chemical composition is influenced by earlier events or processes, which explains the complexity of the distributions in T-T space. However, as both layers show rapid jumps in T-T space between neighboring air masses, recent mixing is expected to be rather weak. This agrees with the concept of turbulent mixing being more intense in the upper and lower part of the jet stream (Shapiro, 1976). Indeed, t~~The situation appears different in the upper part between 349 K and 358 K where the mixing factor diagnostic shows more uniform transitions (Fig. 77b). The layer that connects LMS air in STRA with low H<sub>2</sub>O VMRs in TRO-1 (Fig. 9g8g) shows much more gradual transitions across MIX-1 in T-T space (Fig. 9h8h). Please note that the minimum of observations within MIX-1 (O<sub>3</sub> VMR 200–250 ppm) is a result of the data gap between 19:06 UTC and 19:08 UTC. Figure 89i and j show the vertical transitions at the bottom of the tropopause fold that unlike the vertical transitions in Fig. 9a, b show a mixing of ExTL air (MIX-2) and tropospheric air (TRO-3) below. ~~This was most likely caused by recent turbulent mixing related to strong vertical shear in the lower part of the jet stream.~~

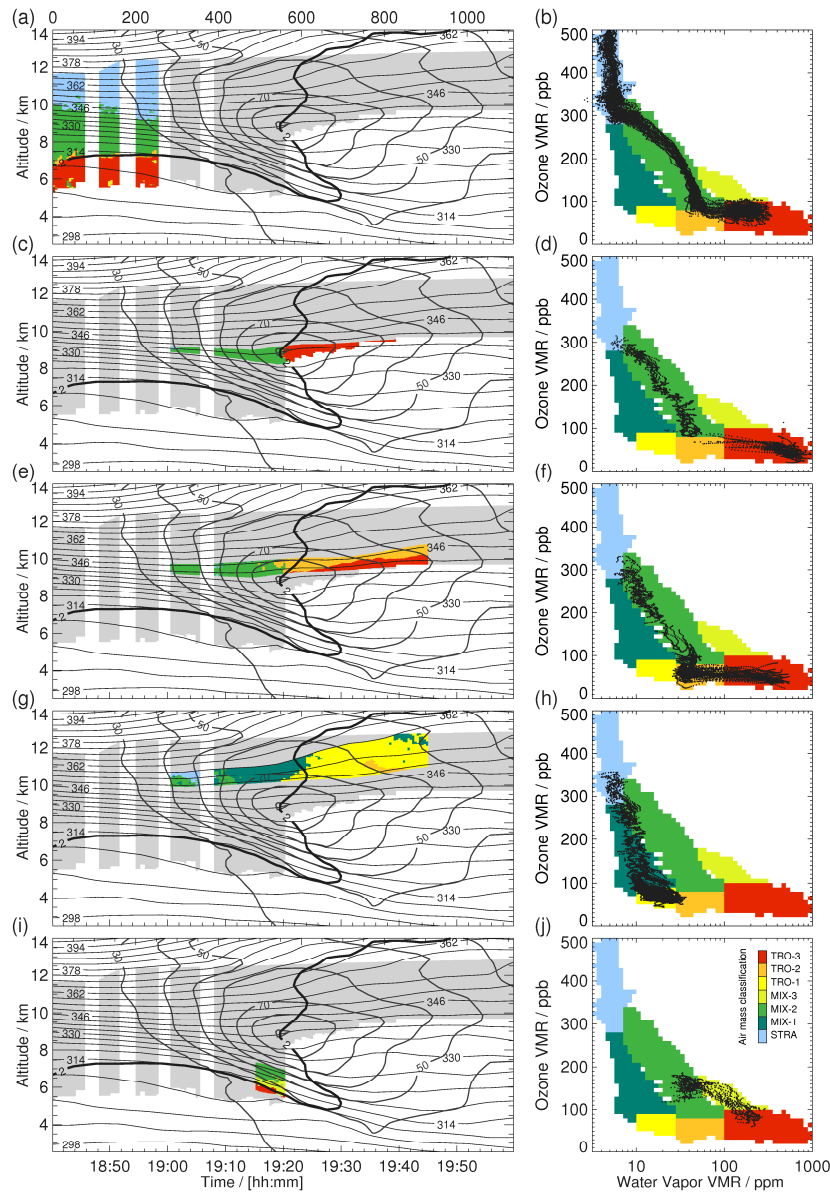

505 **Figure 98:** Data subsets of the collocated lidar data. (a, b) before 19:00 UTC with (a) showing the data as classified in Fig. 7a6 and in (b) as black dots superimposed on the classification of all data shown in Fig. 45c. (c, d) as (a, b) but for data in the time period from 19:00–19:45 UTC in the layer 335–340 K. (e, f) for 19:00 to 19:45 UTC and 340–347 K. (g, h) for 19:00 to 19:45 UTC and 349–358 K. (i, j) for 19:15 to 19:25 UTC and 311–324 K.

### 3.5 ~~Isentropic trace gas gradients~~Chemical and dynamical discontinuities at the tropopause

The interrelation of chemical and dynamical discontinuities at the tropopause is of central interest to understand trace gas distributions and their relation to transport and mixing processes. The dynamical discontinuity is most often defined by the dynamical tropopause, which runs vertically near jet streams as shown in the foregoing discussion, and is therefore suitable to characterize the ExTL along isentropic surfaces crossing it. However, the selection of a PV threshold for the dynamical tropopause is to some extent arbitrary and influences statistical analyses of the ExTL (Pan et al., 2004). In dynamic meteorology often the 2 PVU definition is applied while UTLS studies aimed to search the best agreement of the dynamical with the thermal tropopause (e.g. 3.5 PVU) which varies both regionally and seasonally (Hoerling et al., 1993). Sections 3.3 and 3.4 confirmed earlier findings that the 2 PVU dynamical tropopause (~~using a 2 PVU definition~~) marks the bottom of the ExTL in the situation of a flat tropopause north of the jet stream. However, where the dynamical tropopause is almost vertical, its location relative to the ExTL boundary is found to be variable (Fig. ~~7a~~6). Additionally, the shown mixing factor metric (Fig. 7b) indicates differing strengths in the ExTL transition at different layers within the jet stream., ~~Kunz et al. (2011a) introduced a different definition of the dynamical tropopause which is defined as the maximum isentropic PV gradient which is maximized near jet streams (Martius et al., 2010). They constrained their PV gradient tropopause by the wind speed to correctly identify high wind speed situations near polar and subtropical jet streams. Besides a seasonal increase they found an average increase of PV at their PV gradient tropopause with increasing potential temperature, varying between 1.5 and 5 PVU between 310 and 350 K. In a second step, Kunz et al. (2011b) found better consistency of their PV gradient tropopause with isentropic trace gas gradients of O<sub>3</sub> and CO compared to a fixed PV contour. In their study they used in situ CO and O<sub>3</sub> data from multiple research flights covering a period of three months and one year data from a chemistry climate model to study the seasonal behavior of the chemical and dynamical discontinuities. For a case study they showed that the alignment of dynamical and chemical discontinuities holds for an instantaneous latitudinal cross section using model data only. In the following we extend their analysis for our case using the lidar trace gas distributions to derive isentropic gradients and compare them with the various tropopause definitions.~~

Figure ~~10a-9a~~9a and b show regridded versions of the O<sub>3</sub> and H<sub>2</sub>O cross-sections using potential temperature as vertical coordinate. As in Fig. 3a and b, all available O<sub>3</sub> and H<sub>2</sub>O observations are used for maximum data coverage to determine isentropic gradients. Obviously, the stratospheric air with its strong vertical gradients in potential temperature gets stretched while the tropospheric part shrinks in isentropic coordinates.

The jet stream maximum is located at approx. 340 K with the 2 PVU isoline crossing it. Higher PV isolines appear north of the jet. Additional to arbitrarily selected PV thresholds for the dynamical tropopause (Hoerling et al., 1993), Kunz et al. (2011a)

introduced a dynamical tropopause which is defined as the maximum isentropic PV-gradient which is maximized near jet streams (Martius et al., 2010). The PV-gradient-tropopause is constrained by the wind speed to correctly identify high wind speed situations near polar and subtropical jet streams. Following Kunz et al. (2011a), Figs. 9c and d depict the PV-gradient-tropopause is calculated along the isentropes in the latitudinal cross-section (see white dots in Figs. 10e and d). Note that the quasi-linear interpolation between gridded model data along the 15° W meridian resulted in angular-edged PV distributions on isentropes that required smoothing of the isentropic PV using a moving average. For this reason, PV contours in Figs. 10c and d appear slightly smoothed. Consistent with Kunz et al. (2011a), the PV-gradient-tropopause is shifted to higher PV values with increasing potential temperature. It approximately follows the curvy shape of individual PV isolines. Above and below the level of maximum winds in the region of maximum PV gradients, the PV gradient tropopause is shifted towards higher PV values.

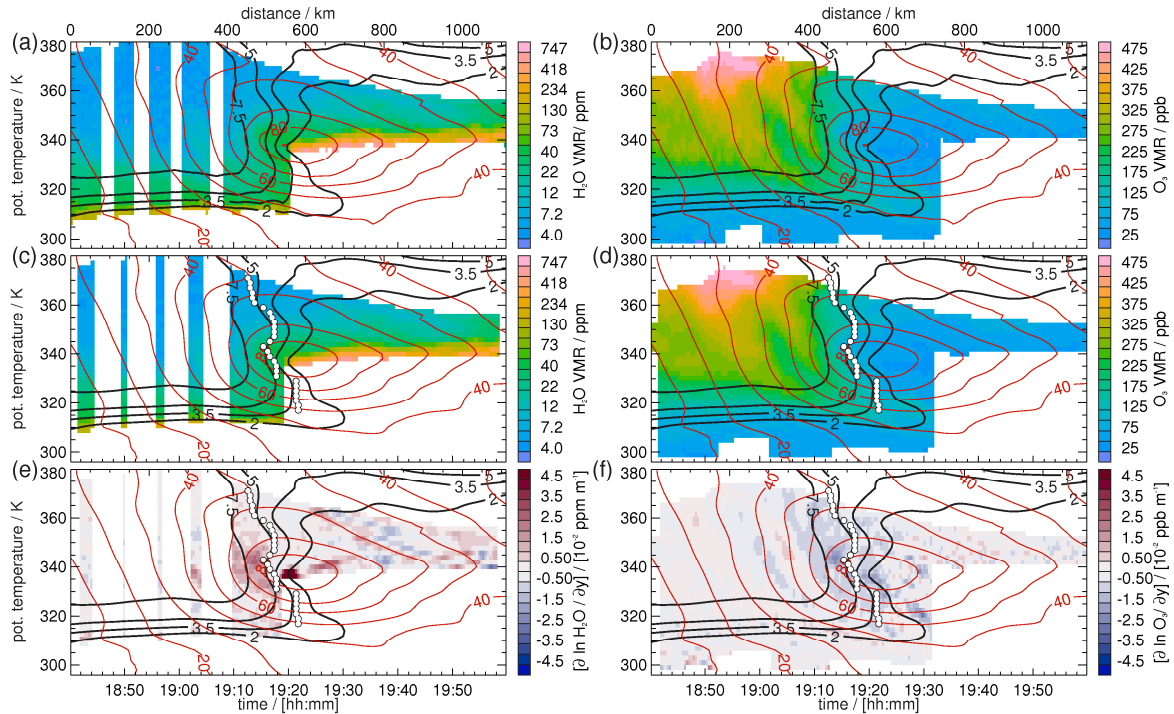

**Figure 240:** RegridDED DIAL observations of (a) H<sub>2</sub>O and (b) O<sub>3</sub> (as shown in Fig. 3) using potential temperature as vertical coordinate (same profile locations and for potential temperature bins of 2 K). (c, d) as (a, b) but using a moving average filter along isentropic levels (using 7 observations for H<sub>2</sub>O and O<sub>3</sub> and 13 model values for PV and wind speed). (e, f) show isentropic gradients of the natural logarithm of VMR H<sub>2</sub>O and VMR O<sub>3</sub> based on the isentropically smoothed data. All panels are superimposed by PV contours (2, 3.5, 5 and 7 PVU,

thick black contours) and wind speed (in  $\text{m s}^{-1}$  for  $> 30 \text{ m s}^{-1}$ ). White dots in c–f mark the PV-gradient-tropopause based on maximum gradients of isentropic PV and winds following Kunz et al. (2011a) (for details see text).

555 To calculate isentropic trace gas gradients from the observational data,  $\text{O}_3$  and  $\text{H}_2\text{O}$  were also smoothed (Fig. 40e9c, d) to account for instrument-generated noise causing strong local gradients. Note that smoothing of the  $\text{H}_2\text{O}$  data increased the data gaps before 19:10 UTC. Trace gas gradients were then calculated for the natural logarithm of the trace gas concentration as suggested by Kunz et al. (2011b) with the purpose of scaling down increased gradients in the source regions at higher concentrations of the trace gas (stratosphere for  $\text{O}_3$  and troposphere for  $\text{H}_2\text{O}$ ). This shifts the focus towards the gradients across the tropopause. Strongest isentropic gradients of  $\text{H}_2\text{O}$  are found at the level of maximum winds within the ExTL (MIX-2), while above  $\text{H}_2\text{O}$  gradients are weaker, where tropospheric  $\text{H}_2\text{O}$  VMR (TRO-1) is lower and mixing within MIX-2 is more uniform (Fig. 40e9e, f). Please note that the highest local gradient  $\sim 19:20$  UTC is related to very high  $\text{H}_2\text{O}$  VMR at the edge of the cloud layer.  $\text{O}_3$ , with higher coverage in the lower part of the tropopause fold, also indicates maximum gradients at the level of maximum winds. Additionally, an increased gradient occurs at the bottom of the fold as compared to  $\text{H}_2\text{O}$ .  $\text{O}_3$  gradients are smaller above 350 K. Some increased positive and negative gradients are found in the stratosphere related to the  $\text{O}_3$  filament. The PV-gradient tropopause follows-better-represents the regions of highest isentropic trace gas gradients much-better than the 2-PVU isoline, especially in case of the  $\text{O}_3$  gradients. It follows the center of maximum  $\text{O}_3$  gradients at the level of highest wind speeds and above. Maximum  $\text{H}_2\text{O}$  gradients are located north of the PV-gradient tropopause at even higher PV values at the jet stream level where pronounced gradients are visible. Kunz et al. (2011b) argue that the better agreement of the PV-gradient tropopause with the stratospheric tracer originates from their common stratospheric concept, in the sense that the chemical tracer  $\text{O}_3$  and the dynamical tracer PV are higher in the stratosphere. In contrast  $\text{H}_2\text{O}$  exhibits stronger tropospheric gradients which are mostly related to transport processes into the UT.

#### 4. Summary and Discussion

575 In this study we analysed mixing of air masses at the extratropical tropopause that shapes the structure and the chemical composition of the ExTL, i.e. a region of central importance for weather and climate. For this purpose, we applied with the first-ever set of collocated  $\text{O}_3$  and  $\text{H}_2\text{O}$  lidar observations obtained during the WISE field campaign over the North Atlantic Ocean in autumn 2017. We demonstrate the potential of quasi-instantaneous  $\text{O}_3$  and  $\text{H}_2\text{O}$  cross-section observations across the tropopause to reveal the complexity in the two-dimensional  $\text{O}_3$  and  $\text{H}_2\text{O}$  distribution in a dynamically rather simple synoptic situation with a perpendicular crossing of a straight south-westerly jet stream. The presented flight on 1 October 2017 captured a low tropopause on the northern cyclonic shear side of the jet stream and a high tropopause with high-reaching tropospheric



air to its south. In-between, a tropopause fold extended downward along tilted isentropes into the lower tropospheric frontal zone before the tropopause strongly ascended accompanied by an upper-level frontal zone above the jet stream. This flight provides exceptionally good data coverage due to low cloud coverage beneath the aircraft and a high flight altitude.

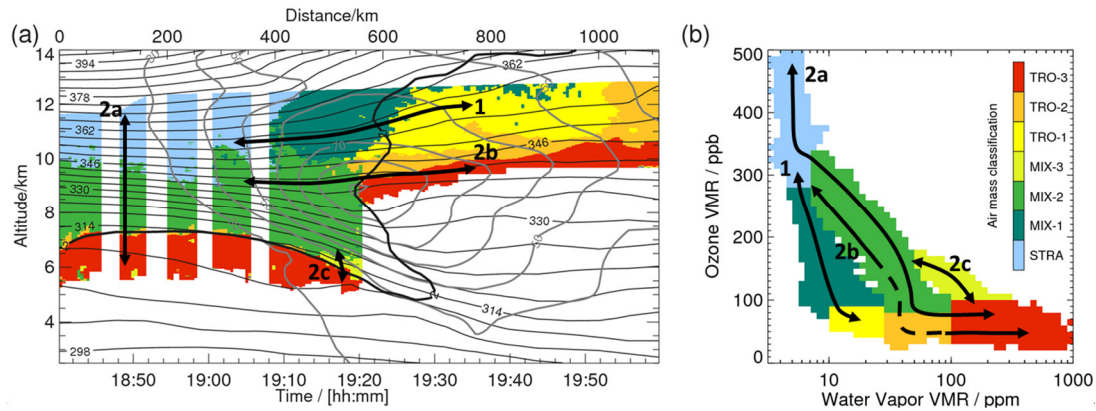

**Figure 11:** (a) as Fig. 7a and (b) as Fig. 5c but superimposed by the main ExTL transitions.

The colocated and range-resolved  $O_3$  and  $H_2O$  lidar profile data along the cross-section feature typical values for the season, latitude and altitude range when compared to climatological values. We show that the precision of the data at a horizontal resolution of 5.6 km is suitable to identify the ExTL and to depict its shape and composition in unprecedented detail by applying established T-T diagnostics. Through a back projection of T-T-derived information to geometrical space, i.e. along the cross-section, physically meaningful thresholds were selected for the air mass classification that so far was barely possible (e.g. Pan et al. 2004). The lidar observations allow the ExTL to be determined for an individual but representative dynamic situation. The 2D depiction represents the first and almost complete observation-based illustration of the ExTL and confirmation of the conceptual model in Gettelman et al., 2011 that shows the ExTL following the tropopause. So far, this concept was based on studies using a limited number of in situ flight legs at different altitudes or model simulations (e.g. Pan et al. 2007; Vogel et al., 2011; Konopka and Pan, 2012).

We further demonstrate that probability densities in T-T space enable us to identify certain clusters of mixing lines (i.e. mixing regimes) and to classify subsets of mixed and tropospheric air. These classes show a remarkably coherent structure in geometrical space. In the upper part of the jet stream, ozone-rich stratospheric air and dry tropospheric air are connected via a distinct mixing regime. Below, a separated mixing regime links stratospheric air with moister tropospheric air. Although these mixed air masses are clearly separated in T-T space, we illustrate that they are stacked directly on top of each other in geometrical space. As the separation in the tropospheric and the mixed air occurs at the same potential temperature ( $\sim 348$  K),



we hypothesize that different transport pathways, in this particular dynamic situation, brought air with differing H<sub>2</sub>O VMRs to the upper-tropospheric end of these mixing regimes. Dry low latitude tropospheric air, being either dehydrated in the convective tropics or losing moisture through lifting to a colder and higher level in a tropical cyclone, arrived above moister extratropical air, typical for the warmer temperatures near the extratropical tropopause (e.g. Hegglin et al., 2009; Zahn et al., 2014). Potentially, Hurricane Maria, which was located in the tropical and subtropical western Atlantic in late September 2017 may have played a role (NOAA/NHC, 2018).

The simultaneous contribution of extra-tropical and tropical tropospheric air to mixing in the ExTL contrasts with the conceptual model of Gettelman et al. (2011) which shows distinct mixing processes at the subtropical and polar jet stream.

However, our findings are in accordance with other case studies that documented large dynamical variability in transport pathways near the extratropical tropopause. A transport of low-latitude tropospheric air is also shown in the upper-troposphere of a mid-latitude jet stream by Vogel et al. (2011). Although our lidar observations are not covering the elevated tropopause on the anticyclonic shear side, we observed a southward extension of mixed air across the dynamical tropopause at highest levels that agrees with their finding of enhanced upper-level mixing. In a likewise synoptic setting, Pan et al. (2007) observed a comparable separation in T-T space, however, the very low H<sub>2</sub>O with increasing O<sub>3</sub> were of stratospheric origin in this case. The presented T-T distributions resemble the satellite-derived climatological distribution of the northern hemispheric mid-latitudes (Hegglin et al., 2009). However, a clear separation of mixed air masses with low H<sub>2</sub>O beside the typical extratropical mixed air is not occurring in the more uniform climatological data that averages over a series of individual dynamic situations. Zahn et al. (2014) find an influence of tropical tropospheric air in summer that is attributed to subsiding subtropical and tropical air masses in the downward branch of the Hadley cell. Thus, this case is considered as a representative set of observations of the ExTL for the season.

We further address the question how mixing lines in T-T space can be interpreted. Our analysis has shown compact regions in T-T space, which, however, even show up in multi-week or multi-month data sets covering different meteorological situations (e.g., Pan et al. 2004; Hegglin et al., 2009). This characteristic makes the T-T method a valuable tool to determine the mean structure and composition of the ExTL. However, it raises the question whether mixing lines for individual cross sections can be interpreted as causal physical links between the observed neighboring air masses or whether the relatively small variability of upper-tropospheric H<sub>2</sub>O and of lower stratospheric O<sub>3</sub> on such time scales is key to the compact distribution. It has to be mentioned that the individual location in T-T space is rather an effect of mixing events in the Lagrangian history of the observed air than an effect of instantaneous mixing that may be suggested by a snapshot taken from the lidar. Even when assuming stationarity of the flow over the past hours, as in this presented case, the observed air masses are separated over a short period

of time due to the strong wind speed shear in the jet. Although the presented combination of methods does not inform about the process, the location and the time of the mixing event that has formed the individual ExTL observation it adds some value considering the dynamical background.

We find that both vertical and horizontal transitions between tropospheric and stratospheric background air form mixing lines.

635 Although the T-T diagram may imply direct mixing between observed air masses, it is difficult to imagine a process that physically links tropospheric stratospheric with a difference in potential temperature of up to 40 K higher in the first part of the flight. This suggests that the ExTL observed in this region is influenced by advection of older mixed air. Further south, the mixing factor metric, adapted from Kunz et al. (2009), reveals uniform isentropic transitions in the upper part of the jet stream pointing to increased mixing while the rapid transitions at the level of maximum winds indicate little mixing. This is confirmed  
640 by consideration of data subsets which only becomes possible through the application of the novel collocated lidar data. Clearly, transitions at the level of the jet stream show jumps in T-T space over small distances along the cross section confirming that recent mixing is expected to be rather weak. Above, the more homogeneous transitions in T-T space likely indicate more recent mixing. Although the mixing factor provides some indication of increased isentropic mixing below the jet stream, unfortunately no observations are available in the lowest part of the tropopause fold due to clouds. However, a  
645 separated mixing regime at the northern edge of the fold suggests recent mixing between ExTL and moist tropospheric air beneath. The determined regions of recent mixing above and below the jet stream fit best with the idea of quasi-instantaneous mixing which confirms and illustrates the well-established concept of turbulence-induced mixing in strong wind shear regions above and below the maximum winds in the jet stream (Danielsen et al. 1968; Shapiro, 1976; Esler et al. 2003; Cooper et al. 2004).

650 We have further investigated the relationship between chemical and dynamical discontinuities which is important for the interpretation of transport and mixing processes between troposphere and stratosphere. In agreement with earlier findings by Pan et al. (2004), in the first part of the flight, the 2 PVU dynamical tropopause marks the lower boundary of the ExTL while the thermal tropopause that coincides approximately with 3.5 PVU contour is located within the ExTL. At the jet stream where the dynamical tropopause runs vertical we provide a depiction of the lidar data and derived H<sub>2</sub>O and O<sub>3</sub> gradients in isentropic  
655 coordinates. For the first time it is confirmed by observations that, for an individual synoptic situation, the chemical discontinuity marked by isentropic trace gas gradients is better represented by the PV-gradient tropopause (Kunz et al., 2011a) than by fixed PV thresholds used for the definition of the dynamical tropopause.

Konopka and Pan (2012) showed that the ExTL formation is influenced by processes on synoptic time scales and highlighted that near the jet stream processes in the last 3 days were particularly important. In a follow-up study we aim to address the

660 question how transport has affected the distribution of trace gases for this particular case and what timescales did impact the different parts of the ExTL by adding a Lagrangian diagnostic. A combination of remote sensing data and in situ observations e.g. of other trace gas species, as shown in Pan et al. (2006), is envisaged to help to further evaluate these results. In the future such DIAL observations of O<sub>3</sub> and H<sub>2</sub>O may be applied to research efforts to investigate various other ~~synoptic-meteorological~~ situations and processes leading to mixing across the tropopause, e.g. above WCBs. Additionally, such ~~two-dimensional~~2D observations of O<sub>3</sub> and H<sub>2</sub>O may be of high relevance for the validation of chemistry and numerical weather prediction models, which suffer from a lack of operational data availability in the ExTL (Magnusson and Sandu, 2019) and rely on a realistic representation of mid-latitude dynamics, accurate parametrization of subgrid-scale mixing processes and realistic chemistry.

### **Data availability**

The lidar data used in this study is available through the HALO database (<https://halo-db.pa.op.dlr.de/>). We are grateful to ECMWF granting access to the full-resolution ERA5 data. The ERA5 data have been downloaded and made available by Dr. Michael Sprenger from ETH Zurich. The ETH access to the ECMWF data is provided by the Swiss National Weather Surface (MeteoSwiss). Meteosat-10 L1 data (HRIT) were provided by EUMETSAT via EUMETCast.

### **Author contribution**

AS designed the study, performed the data analysis, produced the figures and wrote the text. MW performed the data analysis of the DIAL water vapor and ozone data. AF performed DIAL observations during WISE. MW and AF advised on the analysis, contributed with ideas, helped with the interpretation of the data and commented on the paper.

### **Competing interests**

The authors declare that they have no conflicts of interest.

### **Acknowledgment**

680 The authors thank the WISE PIs and the flight planning team for supporting the remote sensing contribution to the campaign and for giving us insight in a new field of research. We are grateful to DLR for supporting this work in the framework of the DLR project “Klimarelevanz von atmosphärischen Spurengasen, Aerosolen und Wolken” (KliSAW). Additionally, we thank the German Science Foundation (DFG) for supporting the HALO contribution to the WISE campaign within the priority

program SPP1294 HALO. We thank our colleagues Dr. Florian Ewald for creating the satellite image and Dr. Heidi Huntrieser  
685 for her valuable comments to the manuscript.

## References

- Appenzeller, C., Davies, H. C., and Norton, W. A.: Fragmentation of stratospheric intrusions, *J. Geophys. Res. Atmos.*, 101 (D1), 1435–1456, doi:10.1029/95JD02674, 1996.
- Birner, T., Dörnbrack, A., and Schumann, U.: How sharp is the tropopause at midlatitudes?, *Geophys. Res. Lett.*, 29, 45–1,  
690 doi:10.1029/2002GL015142, 2002.
- Boothe, A. C. and Homeyer, C. R.: Global large-scale stratosphere–troposphere exchange in modern reanalyses, *Atmos. Chem. Phys.*, 17, 5537–5559, <https://doi.org/10.5194/acp-17-5537-2017>, 2017.
- Brenninkmeijer, C. A. M., Crutzen, P., Boumard, F., Dauer, T., Dix, B., Ebinghaus, R., Filippi, D., Fischer, H., Franke, H., Frieß, U., Heintzenberg, J., Helleis, F., Hermann, M., Kock, H. H., Koepfel, C., Lelieveld, J., Leuenberger, M.,  
695 Martinsson, B. G., Miemczyk, S., Moret, H. P., Nguyen, H. N., Nyfeler, P., Oram, D., O'Sullivan, D., Penkett, S., Platt, U., Pupek, M., Ramonet, M., Randa, B., Reichelt, M., Rhee, T. S., Rohwer, J., Rosenfeld, K., Scharffe, D., Schlager, H., Schumann, U., Slemr, F., Sprung, D., Stock, P., Thaler, R., Valentino, F., van Velthoven, P., Waibel, A., Wandel, A., Waschitschek, K., Wiedensohler, A., Xueref-Remy, I., Zahn, A., Zech, U., and Ziereis, H.: Civil Aircraft for the regular investigation of the atmosphere based on an instrumented container: The new CARIBIC system, *Atmos. Chem. Phys.*, 7,  
700 4953–4976, <https://doi.org/10.5194/acp-7-4953-2007>, 2007.
- Browell, E. V., Danielsen, E. F., Ismail, S., Gregory, G. L., and Beck, S. M.: Tropopause fold structure determined from airborne lidar and in situ measurements, *J. Geophys. Res.*, 92(D2), 2112–2120, doi:10.1029/JD092iD02p02112, 1987.
- Browell, E. V., Ismail, S., and Grant, W. B.: Differential absorption lidar (DIAL) measurements from air and space, *Appl. Phys.*, 67B, 399–410, doi:10.1007/s003400050523, 1998.
- 705 Browning, K. A., Hardman, M. E., Harrold, T. W., and Pardoe, C. W.: Structure of rainbands within a mid-latitude depression, *Q. J. Roy. Meteor. Soc.*, 99, 215–231, 1973.
- Danielsen, E. F.: Stratospheric-tropospheric exchange based on radioactivity, ozone and potential vorticity, *J. Atmos. Sci.*, 25, 502–518, 1968.
- Danielsen, E. F., Hipskind, R. S., Gaines, S. E., Sachse, G. W., Gregory, G. L., and Hill, G. F.: Three-dimensional analysis of  
710 potential vorticity associated with tropopause folds and observed variations of ozone and carbon monoxide, *J. Geophys. Res.*, 92(D2), 2103–2111, doi:10.1029/JD092iD02p02103, 1987.

- Ehret, G., Hoinka, K. P., Stein, J., Fix, A., Kiemle, C., and Poberaj, G.: Low stratospheric water vapour measured by an airborne DIAL, *J. Geophys. Res. Atmos.*, 104 (D24), 31 351–31 359, doi:10.1029/1999JD900959, 1999.
- 715 Fischer, H., Wienhold, F. G., Hoor, P., Bujok, O., Schiller, C., Siegmund, P., Ambaum, M., Scheeren, H. A., and Lelieveld, J.: Tracer correlations in the northern high latitude lowermost stratosphere: Influence of cross-tropopause mass exchange, *Geophys. Res. Lett.*, 27(1), 97–100, doi:10.1029/1999GL010879, 2000.
- Fix, A., Steinebach, F., Wirth, M., Schäfler, A., and Ehret, G.: Development and application of an airborne differential absorption lidar for the simultaneous measurement of ozone and water vapor profiles in the tropopause region, *Appl. Opt.* 58, 5892–5900, 2019.
- 720 Gettelman, A., Hoor, P., Pan, L. L., Randel, W. J., Hegglin, M. I., and Birner, T.: The extratropical upper troposphere and lower stratosphere, *Rev. Geophys.*, 49 (3), doi:10.1029/2011RG000355, 2011.
- Gray, S. L.: A case study of stratosphere to troposphere transport: The role of convective transport and the sensitivity to model resolution, *J. Geophys. Res. Atmos.*, 108 (D18), doi:10.1029/2002JD003317, 2003.
- 725 Gray, S., Dunning, C., Methven, J., Masato, G., and Chagnon, J.: Systematic model forecast error in Rossby wave structure, *Geophys. Res. Lett.*, 41 (8), 2979–2987, doi:10.1002/2014GL059282, 2014.
- Hegglin, M. I., Boone, C. D., Manney, G. L., Shepherd, T. G., Walker, K. A., Bernath, P. F., Daffer, W. H., Hoor, P., and Schiller, C.: Validation of ACE-FTS satellite data in the upper troposphere/lower stratosphere (UTLS) using non-coincident measurements, *Atmos. Chem. Phys.*, 8, 1483–1499, <http://www.atmos-chem-phys.net/8/1483/2008/>, 2008.
- 730 Hegglin, M. I., Boone, C. D., Manney, G. L., and Walker, K. A.: A global view of the extratropical tropopause transition layer from Atmospheric Chemistry Experiment Fourier Transform Spectrometer O<sub>3</sub>, H<sub>2</sub>O, and CO, *J. Geophys. Res. Atmos.*, 114 (D7), doi:10.1029/2008JD009984, 2009.
- Hersbach, H., Bell, B., Berrisford, P., Hirahara, S., Horányi, A., Muñoz-Sabater, J., Nicolas, J., Peubey, C., Radu, R., Schepers, D., Simmons, A., Soci, C., Abdalla, S., Abellan, X., Balsamo, G., Bechtold, P., Biavati, G., Bidlot, J., Bonavita, M., De Chiara, G., Dahlgren, P., Dee, D., Diamantakis, M., Dragani, R., Flemming, J., Forbes, R., Fuentes, M., Geer, A., Haimberger, L., Healy, S., Hogan, R. J., Hólm, E., Janisková, M., Keeley, S., Laloyaux, P., Lopez, P., Lupu, C., Radnoti, G., de Rosnay, P., Rozum, I., Vamborg, F., Villaume, S., and Thépaut, J.-N.: The ERA5 global reanalysis, *Q. J. Roy. Meteor. Soc.*, 146, 1999–2049, <https://doi.org/10.1002/qj.3803>, 2020.
- 735 Hintsa, E. J., Boerling, K. A., Weinstock, E. M., Anderson, J. G., Gary, B. L., Pfister, L., Daube, B. C., Wofsy, S. C., Loewenstein, M., Podolske, J. R., Margitan, J. J., and Bui, T. P.: Troposphere-to-stratosphere transport in the lowermost

- 740 stratosphere from measurements of H<sub>2</sub>O, CO<sub>2</sub>, N<sub>2</sub>O and O<sub>3</sub>, *Geophys. Res. Lett.*, 25, 2655–2658, doi:10.1029/98GL01797, 1998.
- Holton, J. R., Haynes, P. H., McIntyre, M. E., Douglass, A. R., Rood, R. B., and Pfister L.: Stratosphere-troposphere exchange, *Rev. Geophys.*, 33 (4), 403–439, doi:10.1029/95RG02097, 1995.
- Hoor, P., Fischer, H., Lange, L., Lelieveld, J., and Brunner, D.: Seasonal variations of a mixing layer in the lowermost  
745 stratosphere as identified by the CO-O<sub>3</sub> correlation from in situ measurements, *J. Geophys. Res. Atmos.*, 107 (D5), doi:10.1029/2000JD000289, 2002.
- Hoor, P., Gurk, C., Brunner, D., Hegglin, M. I., Wernli, H., and Fischer, H.: Seasonality and extent of extratropical TST derived from in-situ CO measurements during SPURT, *Atmos. Chem. Phys.*, 4 (5), 1427–1442, doi:10.5194/acp-4-1427-2004, 2004.
- 750 Huntrieser, H., Lichtenstern, M., Scheibe, M., Aufmhoff, H., Schlager, H., Pucik, T., Minikin, A., Weinzierl, B., Heimerl, K., Fütterer, D., Rappenglück, B., Ackermann, L., Pickering, K. E., Cummings, K. A., Biggerstaff, M. I., Betten, D. P., Honomichl, S., and Barth, M. C.: On the origin of pronounced O<sub>3</sub> gradients in the thunderstorm outflow region during DC3, *J. Geophys. Res.- Atmos.*, 121, 6600–6637, <https://doi.org/10.1002/2015jd024279>, 2016.
- Keyser, D. and Shapiro, M.: A review of the structure and dynamics of upper-level frontal zones, *Mon. Weather Rev.*, 114,  
755 452–499, [https://doi.org/10.1175/1520-0493\(1986\)114<0452:AROTSA>2.0.CO;2](https://doi.org/10.1175/1520-0493(1986)114<0452:AROTSA>2.0.CO;2), 1986.
- Kiemle, C., Wirth, M., Fix, A., Rahm, S., Corsmeier, U., and Di Girolamo, P.: Latent heat flux measurements over complex terrain by airborne water vapour and wind lidars, *Q. J. Roy. Meteor. Soc.*, 137, 190–203. doi:10.1002/qj.757, 2011.
- Konopka, P., and Pan, L. L.: On the mixing-driven formation of the Extratropical Transition Layer (ExTL), *J. Geophys. Res. Atmos.*, 117 (D18), doi:10.1029/2012JD017876, 2012.
- 760 Kooi, S., Fenn, M., Ismail, S., Ferrare, R., Hair, J., Browell, E., Notari, A., Butler, C., Burton, S., and Simpson, S.: Airborne LIDAR Measurements of Water Vapor, Ozone, Clouds, and Aerosols in the Tropics Near Central America During the TC4 Experiment, 24th International Laser Radar Conference; 23–27 Jun. 2008; Boulder, Co; United States, available at: <https://ntrs.nasa.gov/search.jsp?R=20080023791>, 2008.
- Krautstrunk, M. and Giez, A.: The transition from FALCON to HALO era airborne atmospheric research, in: *Atmospheric Physics: Background – Methods – Trends*, edited by: Schumann, U., Springer-Verlag Berlin Heidelberg, 609–624, 2012.
- 765 Krebsbach, M., Schiller, C., Brunner, D., Günther, G., Hegglin, M. I., Mottaghy, D., Riese, M., Spelten, N., and Wernli, H.: Seasonal cycles and variability of O<sub>3</sub> and H<sub>2</sub>O in the UT/LMS during SPURT, *Atmos. Chem. Phys.*, 6, 109–125, <https://doi.org/10.5194/acp-6-109-2006>, 2006.

- Kunkel, D., Hoor, P., Kaluza, T., Ungermann, J., Kluschat, B., Giez, A., Lachnitt, H.-C., Kaufmann, M., and Riese, M.:  
 770 Evidence of small-scale quasi-isentropic mixing in ridges of extratropical baroclinic waves, *Atmos. Chem. Phys.*, 19,  
 12607–12630, <https://doi.org/10.5194/acp-19-12607-2019>, 2019.
- Kunz, A., Konopka, P., Müller, R., Pan, L. L., Schiller, C., and Rohrer, F.: High static stability in the mixing layer above the  
 extratropical tropopause, *J. Geophys. Res.-Atmos.*, 114, 1–9, <https://doi.org/10.1029/2009JD011840>, 2009.
- Kunz, A., Konopka, P., Müller, R., and Pan, L. L.: Dynamical tropopause based on isentropic potential vorticity gradients, *J.*  
 775 *Geophys. Res.*, 116, D01110, doi:10.1029/2010JD014343, 2011a.
- Kunz, A., Pan, L. L., Konopka, P., Kinnison, D. E., and Tilmes, S.: Chemical and dynamical discontinuity at the extratropical  
 tropopause based on START08 and WACCM analyses, *J. Geophys. Res.*, 116, D24302, doi:10.1029/2011JD016686,  
 2011b.
- Lang, A. A., and Martin, J. E.: The structure and evolution of lower stratospheric frontal zones. Part 1: Examples in  
 780 northwesterly and southwesterly flow, *Q. J. Roy. Meteor. Soc.*, 138 1350–1365. doi:10.1002/qj.843, 2012.
- Magnusson, L., and Sandu, I.: Experts review synergies between observational campaigns and weather forecasting, ECMWF  
 Newsletter, No. 161, ECMWF, Reading, United Kingdom, available at:  
<https://www.ecmwf.int/sites/default/files/elibrary/2019/19263-newsletter-no-161-autumn-2019.pdf>, 2019.
- Martius, O., Schwierz, C., and Davies, H. C.: Tropopause-Level Waveguides, *J. Atmos. Sci.*, 67, 866–879,  
 785 <https://doi.org/10.1175/2009JAS2995.1>, 2010.
- NOAA/NHC: National Hurricane Center Tropical Cyclone Report - Hurricane Maria (AL152017), available at:  
[https://www.nhc.noaa.gov/data/tcr/AL152017\\_Maria.pdf](https://www.nhc.noaa.gov/data/tcr/AL152017_Maria.pdf), 2018.
- Oelhaf, H., Sinnhuber, B., Woiwode, W., Bönisch, H., Bozem, H., Engel, A., Fix, A., Friedl-Vallon, F., Grooß, J., Hoor, P.,  
 Johansson, S., Jurkat-Witschas, T., Kaufmann, S., Krämer, M., Krause, J., Kretschmer, E., Lörks, D., Marsing, A.,  
 790 Orphal, J., Pfeilsticker, K., Pitts, M., Poole, L., Preusse, P., Rapp, M., Riese, M., Rolf, C., Ungermann, J., Voigt, C.,  
 Volk, C. M., Wirth, M., Zahn, A., and Ziereis, H.: POLSTRACC: Airborne Experiment for Studying the Polar  
 Stratosphere in a Changing Climate with the High Altitude and Long Range Research Aircraft (HALO), *Bull. Amer.*  
*Meteor. Soc.*, 100, 2634–2664, <https://doi.org/10.1175/BAMS-D-18-0181.1>, 2019.
- Pan, L. L., Randel, W. J., Gary, B. L., Mahoney, M. J., and Hints, E. J.: Definitions and sharpness of the extratropical  
 795 tropopause: A trace gas perspective, *J. Geophys. Res. Atmos.*, 109 (D23), doi:10.1029/2004JD004982, 2004.
- Pan, L. L., Konopka, P., and Browell, E. V.: Observations and model simulations of mixing near the extratropical  
 tropopause, *J. Geophys. Res.*, 111, D05106, doi:10.1029/2005JD006480, 2006.



- Pan, L. L., and Bowman, K. P., Shapiro, M., Randel, W. J., Gao, R. S., Campos, T., Davis, C., Schauffler, S., Ridley, B. A., Wei, J. C., and Barnett, C.: Chemical behavior of the tropopause observed during the Stratosphere-Troposphere Analyses of Regional Transport experiment, *J. Geophys. Res. Atmos.*, 112, doi:10.1029/2007JD008645, 2007.
- Pan, L. L., Homeyer, C. R., Honomochi, S., Ridley, B. A., Weisman, M., Barth, M. C., Hair, J. W., Fenn, M. A., Butler, C., Diskin, G. S., Crawford, J. H., Ryerson, T. B., Pollack, I., Peischl, J., and Huntrieser, H.: Thunderstorms enhance tropospheric ozone by wrapping and shedding stratospheric air, *Geophys. Res. Lett.*, 41, 7785–7790, <https://doi.org/10.1002/2014GL061921>, 2014a.
- Pan, L. L., Paulik, L. C., Honomichl, S. B., Munchak, L. A., Bian, J., Selkirk, H. B., and Vömel, H.: Identification of the tropical tropopause transition layer using the ozone-water vapour relationship, *J. Geophys. Res. Atmos.*, 119 (6), 3586–3599, doi:10.1002/2013JD020558, 2014b.
- Pan, L. L., Honomichl, S. B., Bui, T. V., Thornberry, T., Rollins, A., Hints, E., and Jensen, E. J.: Lapse Rate or Cold Point: The Tropical Tropopause Identified by In Situ Trace Gas Measurements, *Geophys. Res. Lett.*, 45, 10756–10763, <https://doi.org/10.1029/2018GL079573>, 2018.
- Randel, W. J., Seidel, D. J., and Pan, L. L.: Observational characteristics of double tropopauses, *J. Geophys. Res.*, 112, D07309, doi:10.1029/2006JD007904.0020, 2007.
- Reutter, P., Škerlak, B., Sprenger, M., and Wernli, H.: Stratosphere-troposphere exchange (STE) in the vicinity of North Atlantic cyclones, *Atmos. Chem. Phys.*, 15 (19), 10 939–10 953, doi:10.5194/acp-15-10939-2015, 2015.
- Riese, M., Ploeger, F., Rap, A., Vogel, B., Konopka, P., Dameris, M., and Forster, P.: Impact of uncertainties in atmospheric mixing on simulated UTLS composition and related radiative effects, *J. Geophys. Res. Atmos.*, 117 (D16), doi:10.1029/2012JD017751, 2012.
- Schäfler A., Dörnbrack A., Kiemle C., Rahm S., and Wirth M.: Tropospheric water vapour transport as determined from airborne lidar measurements, *J. Atmos. Oceanic Technol.* 27, 2017–2030, 2010.
- Schäfler, A., and Harnisch, F.: Impact of the inflow moisture on the evolution of a warm conveyor belt, *Q. J. Roy. Meteor. Soc.*, 141, 299–310. doi:10.1002/qj.2360, 2015.
- Schäfler, A., Craig, G., Wernli, H., Arbogast, P., Doyle, J. D., McTaggart-Cowan, R., Methven, J., Rivière, G., Ament, F., Boettcher, M., Bramberger, M., Cazenave, Q., Cotton, R., Crewell, S., Delanoë, J., Dörnbrack, A., Ehrlich, A., Ewald, F., Fix, A., Grams, C. M., Gray, S. L., Grob, H., Groß, S., Hagen, M., Harvey, B., Hirsch, L., Jacob, M., Kölling, T., Konow, H., Lemmerz, C., Lux, O., Magnusson, L., Mayer, B., Mech, M., Moore, R., Pelon, J., Quinting, J., Rahm, S., Rapp, M., Rautenhaus, M., Reitebuch, O., Reynolds, C. A., Sodemann, H., Spengler, T., Vaughan, G., Wendisch, M.,

- Wirth, M., Witschas, B., Wolf, K., and Zinner, T.: The North Atlantic Waveguide and Downstream Impact Experiment, *Bull. Amer. Meteor. Soc.*, 99, 1607–1637, <https://doi.org/10.1175/BAMS-D-17-0003.1>, 2018.
- Schäfler, A., Harvey, B., Methven, J., Doyle, J. D., Rahm, S., Reitebuch, O., Weiler, F., and Witschas B.: Observation of jet stream winds during NAWDEX and characterization of systematic meteorological analysis error. *Mon. Weather Rev.* in review, 2020.
- Shapiro, M. A.: The role of turbulent heat flux in the generation of potential vorticity of upper-level jet stream systems, *Mon. Weather Rev.*, 104, 892–906, 1976.
- Shapiro, M. A.: Turbulent Mixing within Tropopause Folds as a Mechanism for the Exchange of Chemical Constituents between the Stratosphere and Troposphere, *J. Atmos. Sci.*, 37 (5), 994–1004, doi:10.1175/1520-0469(1980)037h0994:TMWTFAi2.0.CO;2, 1980.
- Škerlak, B., Sprenger, M., and Wernli, H.: A global climatology of stratosphere–troposphere exchange using the ERA-Interim data set from 1979 to 2011, *Atmos. Chem. Phys.*, 14, 913–937, doi:10.5194/acp-14-913-2014, 2014.
- Spreitzer, E., Attinger, R., Boettcher, M., Forbes, R., Wernli, H., and Joos, H.: Modification of Potential Vorticity near the Tropopause by Nonconservative Processes in the ECMWF Model, *J. Atmos. Sci.*, 76, 1709–1726, <https://doi.org/10.1175/JAS-D-18-0295.1>, 2019.
- Sprenger, M., and Wernli, H.: A northern hemispheric climatology of cross-tropopause exchange for the ERA15 time period (1979–1993), *J. Geophys. Res. Atmos.*, 108 (D12), doi:10.1029/2002JD002636, 2003.
- Stohl, A., Bonasoni, P., Cristofanelli, P., Collins, W., Feichter, J., Frank, A., Forster, C., Gerasopoulos, E., Gaggeler, H., James, P., Kentarchos, T., Kromp-Kolb, H., Kruger, B., Land, C., Meloen, J., Papayannis, A., Priller, A., Seibert, P., Sprenger, M., Roelofs, G. J., Scheell, H., E. Schnabel, C., Siegmund, P., Tobler, L., Trickl, T., Wernli, H., Wirth, V., Zanis, P., and Zerefos, C.: Stratosphere-troposphere exchange: A review, and what we have learned from STACCATO, *J. Geophys. Res. Atmos.*, 108 (D12), doi:10.1029/2002JD002490, 2003.
- Tilmes, S., , Pan, L. L., Hoor, P., Atlas, E., Avery, M. A., Campos, T., Christensen, L. E., Diskin, G. S., Gao, R.-S., Herman, R. L., Hints, E. J., Loewenstein, M., Lopez, J., Paige, M. E., Pittman, J. V., Podolske, J. R., Proffitt, M. R., Sachse, G. W., Schiller, C., Schlager, H., Smith, J., Spelten, N., Webster, C., Weinheimer, A., and Zondlo, M. A.: An aircraft-based upper troposphere lower stratosphere O<sub>3</sub>, CO, and H<sub>2</sub>O climatology for the Northern Hemisphere. *J. Geophys. Res. Atmos.*, 115, doi:10.1029/2009JD012731, 2010.

- Trickl, T., Vogelmann, H., Fix, A., Schäfler, A., Wirth, M., Calpini, B., Levrat, G., Romanens, G., Apituley, A., Wilson, K.  
855 M., Begbie, R., Reichardt, J., Vömel, H., and Sprenger, M.: How stratospheric are deep stratospheric intrusions?  
LUAMI 2008, *Atmos. Chem. Phys.*, 16, 8791–8815, <https://doi.org/10.5194/acp-16-8791-2016>, 2016.
- Ungermann, J., Pan, L. L., Kalicinsky, C., Olschewski, F., Knieling, P., Blank, J., Weigel, K., Guggenmoser, T., Stroh, F.,  
Hoffmann, L., and Riese, M.: Filamentary structure in chemical tracer distributions near the subtropical jet following a  
wave breaking event, *Atmos. Chem. Phys.*, 13, 10517–10534, <https://doi.org/10.5194/acp-13-10517-2013>, 2013.
- 860 Urbanek, B., Groß, S., Schäfler, A., and Wirth, M.: Determining stages of cirrus evolution: a cloud classification scheme,  
*Atmos. Meas. Tech.*, 10, 1653–1664, <https://doi.org/10.5194/amt-10-1653-2017>, 2017.
- Vogel, B., Pan, L. L., Konopka, P., Günther, G., Müller, R., Hall, W., Campos, T., Pollack, I., Weinheimer, A., Wei, J., Atlas,  
E. L., and Bowman, K. P.: Transport pathways and signatures of mixing in the extratropical tropopause region derived  
from Lagrangian model simulations, *J. Geophys. Res.*, 116, D05306, doi:10.1029/2010JD014876, 2011.
- 865 Wernli, H. and Davies, H. C.: A lagrangian-based analysis of extratropical cyclones. I: The method and some applications, *Q.*  
*J. Roy. Meteor. Soc.*, 123, 467–489, <https://doi.org/10.1002/qj.49712353811>, 1997.
- Wernli, H., and Bourqui, M.: A Lagrangian 1-year climatology of (deep) cross-tropopause exchange in the extratropical  
Northern Hemisphere, *J. Geophys. Res. Atmos.*, 107 (D2), ACL 13–1–ACL13–16, doi:10.1029/2001JD000812, 2000.
- Wirth, M., Fix, A., Mahnke, P., Schwarzer, H., Schrandt, F., and Ehret, G.: The airborne multi-wavelength water vapour  
870 differential absorption lidar WALES: system design and performance, *Appl. Phys.*, 96B, doi:10.1007/s00340-009-3365-  
7, 2009.
- Woiwode, W., Dörnbrack, A., Bramberger, M., Friedl-Vallon, F., Haenel, F., Höpfner, M., Johansson, S., Kretschmer, E.,  
Krisch, I., Latzko, T., Oelhaf, H., Orphal, J., Preusse, P., Sinnhuber, B.-M., and Ungermann, J.: Mesoscale fine structure  
of a tropopause fold over mountains, *Atmos. Chem. Phys.*, 18, 15643–15667, [https://doi.org/10.5194/acp-18-15643-](https://doi.org/10.5194/acp-18-15643-2018)  
875 2018, 2019.
- [World Meteorological Organization \(WMO\), Meteorology – A three-dimensional science, WMO Bull., 6, 134–138, 1957.](#)
- Zahn, A., and Brenninkmeijer, C.: New directions: a chemical tropopause defined, *Atmos. Environ.*, 37, 439–440, 2003.
- Zahn, A., Christner, E., van Velthoven, P. F. J., Rauthe-Schoch, A., and Brenninkmeijer, C. A. M.: Processes controlling water  
vapor in the upper troposphere/lowermost stratosphere: An analysis of 8 years of monthly measurements by the IAGOS-  
880 CARIBIC observatory, *J. Geophys. Res.-Atmos.*, 119, 11505–11525, <https://doi.org/10.1002/2014JD021687>, 2014.
- Zierl, B., and Wirth, V.: The influence of radiation on tropopause behavior and stratosphere-troposphere exchange in an upper  
tropospheric anticyclone, *J. Geophys. Res. Atmos.*, 102 (D20), 23 883–23 894, doi:10.1029/97JD01667, 1997.
